# Supplementary material
Source: PubMed Central journal article supplement (PMC5563453)

## Supplementary Figure Legends

**Supplementary Figure S5.** A distinct transcriptional signature for DDR genes in Bi-Tg thyrocytes. **(a)** DDR genes down-regulated >1.5-fold (i.e. relative expression level  $\leq 0.66$ ) in Bi-Tg, PTTG-Tg and PBF-Tg thyrocytes vs WT controls as indicated (mean,  $n=3$  arrays, unpaired two-tailed  $t$ -test,  $P<0.05$ ). **(b)** Transcriptional signature of 79 DDR genes in PTTG-Tg (triangles), PBF-Tg (diamonds) and Bi-Tg (squares) thyrocytes (mean,  $n=3$  arrays, <sup>1</sup>Kruskal-Wallis test, <sup>2</sup>Mann-Whitney test) (NS, not significant;  $*P=0.024$ ;  $***P$ -values are shown). Red filled circle indicates a p53 target gene. Key features of transcriptional signature for Bi-Tg thyrocytes include: **(1)** significant repression of a subset of 41 DDR genes between Bi-Tg and PTTG-Tg with expression  $>0.8$  (range 0.8-3.2 in PTTG-Tg;  $***P=1.8 \times 10^{-5}$ ); **(2)** DDR genes repressed in Bi-Tg thyrocytes vs PBF-Tg and PTTG-Tg thyrocytes, including PMS1, GTF2H1, GADD45, MLH1, MGMT, GTF2H2, POLH, REV1, PARP2, DCLRE1A, PARP1, RAD51C, XRCC6, TERF1 and UNG; **(3)** significant down-regulation of DDR genes >1.5-fold ( $n=31$  genes;  $*P<0.05$ ) in Bi-Tg vs WT, and **(4)** significant repression of a subset of 38 DDR genes between Bi-Tg and PBF-Tg thyrocytes with expression  $<0.8$  (range 0.15-0.8 in PTTG-Tg;  $***P=9.42 \times 10^{-7}$ ). SRD5A2, TNP1 and RBBP4 not included from Figure 2a due to lack of expression in all 4 genotypes. **(c)** Order of DDR genes plotted in Figure 2b and c are shown.

**Supplementary Figure S6.** Correlation of DDR transcriptional signature with p53 target gene status. **(a)** Transcriptional signature of subset of DDR genes in PTTG-Tg (triangles), PBF-Tg (diamonds) and Bi-Tg (squares) thyrocytes with relative expression  $>0.8$  (range 0.8-3.2 in PTTG-Tg) (mean,  $n=3$  arrays, <sup>1</sup>Kruskal-Wallis test, <sup>2</sup>Mann-Whitney test, <sup>3</sup>unpaired two-tailed  $t$ -test) (NS, not significant;  $*P=0.018$ ;  $**P=0.002$ ;  $***P=1.8 \times 10^{-5}$ ). Filled circles (underneath) indicate the status of each DDR gene as a p53 target gene. p53 target gene categories include DDR genes regulated by a p53 response element (red), the p53-p21 pathway (orange), the p53-miRNA pathway (blue) and other pathways such as the p53-lincRNA-21 pathway and known interactions with transcription factors (black). Further information and literature evidence for p53 target gene categories is provided in Supplementary Table S1. **(b)** Same as (a) except but using subset of DDR genes with relative expression  $<0.8$  (range 0.15-0.8 in PTTG-Tg) ( $*P=0.017$ ;  $***P$ -values are shown). DDR genes with relative expression  $<0.8$  in PTTG-Tg were more likely to be regulated by the p53-miR-34 pathway (10/38 genes) than DDR genes in PTTG-Tg with expression  $>0.8$  (2/41 genes;  $P=0.011$ ; Fishers exact test). Expression cut-off value of 0.8 was chosen as it approximates to the mean expression value for all 79 DDR genes in the three transgene genotypes (i.e.  $0.82 \pm 0.04$ ). SRD5A2, TNP1 and RBBP4 not included from Figure 2a due to lack of expression in all 4 genotypes. **(c)** Order of DDR genes plotted in panels (a) and (b) above.

**Supplementary Figure S7.** Expression levels of pChk1(Ser345) in thyroid tissue. Representative images of pChk1(Ser345) expression in wild-type (WT) and Bi-Tg thyroids in **(a)** 26 and **(b)** 78 week old mice. **(c)** Representative images of pChk1(Ser345) expression in a human differentiated thyroid tumour (middle and right panels) and normal thyroid tissue (left panel). Scale bars, 100  $\mu\text{m}$ .

# Supplementary Figure S5

**a**

|                                                                                                                                                                                                              |
|--------------------------------------------------------------------------------------------------------------------------------------------------------------------------------------------------------------|
| <b>Genes down-regulated &gt;1.5-fold in Bi-Tg thyrocytes (<math>P&lt;0.05</math>) versus WT thyrocytes (<math>n=31</math>)</b>                                                                               |
| TRPC2, BRCA1, CHEK1, UNG, PMS2, EXO1, MBD4, CHAF1A, FEN1, POLE, FANCG, XRCC3, TREX1, MUTYH, XRCC6, FANCC, RAD51C, MGMT, APEX1, GADD45, RAD18, XPA, CRY2, TERF1, MLH3, DCLRE1A, MSH3, MPG, XRCC2, SMC3, PARP2 |
| <b>Genes down-regulated &gt;1.5-fold in PTTG-Tg thyrocytes (<math>P&lt;0.05</math>) versus WT thyrocytes (<math>n=29</math>)</b>                                                                             |
| BRCA1, EXO1, CHEK1, RAD51, POLE, CHAF1A, RAD18, FANCC, FEN1, PMS2, MBD4, XPA, FANCG, TREX, MPG, PTTG1, RAD50, POLD1, LIG1, CRY2, UNG, WRN, MUTYH, ATM, APEX1, XRCC2, PRKDC, MSH3                             |
| <b>Genes down-regulated &gt;1.5-fold PBF-Tg thyrocytes (<math>P&lt;0.05</math>) versus WT thyrocytes (<math>n=10</math>)</b>                                                                                 |
| TRPC2, XRCC3, MUTYH, RAD9B, FANCG, UNG, XRCC6, MBD4, MLH3, XRCC2                                                                                                                                             |

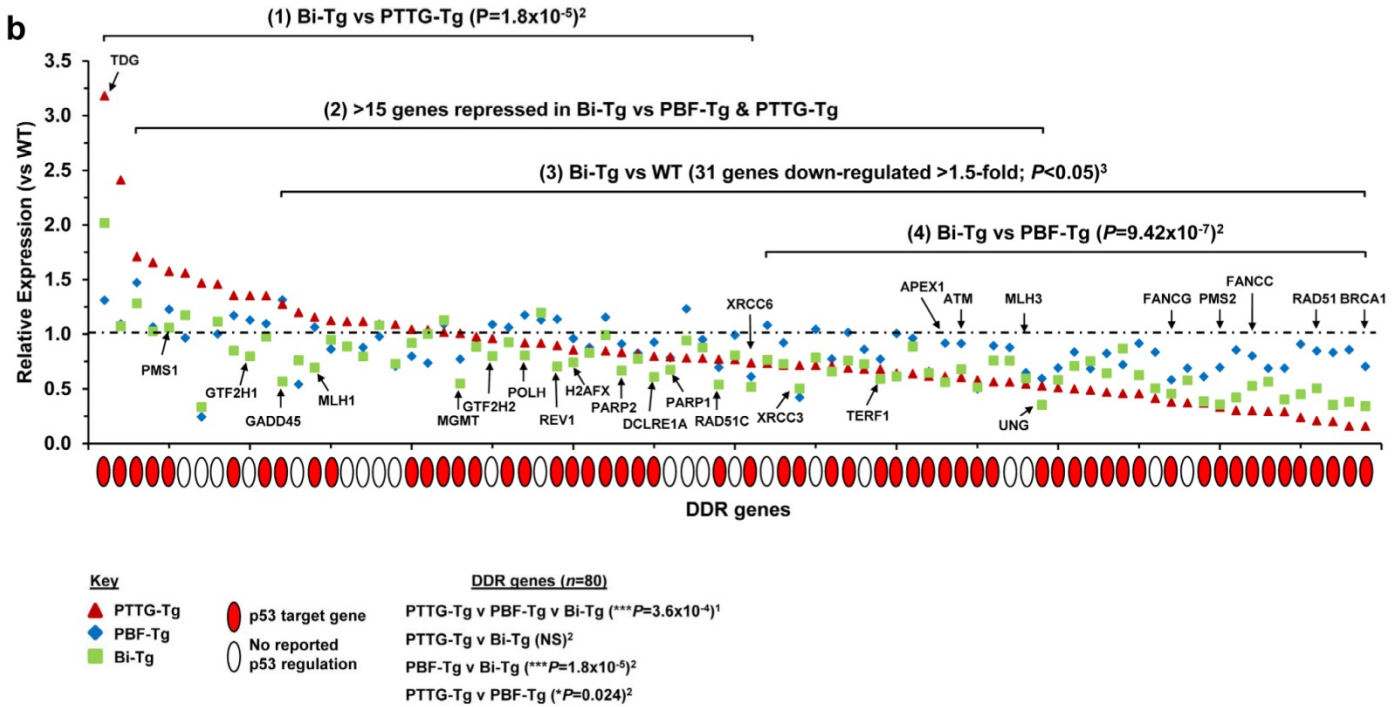

**c**

|                                                                                                                                                                                                                                                                                    |
|------------------------------------------------------------------------------------------------------------------------------------------------------------------------------------------------------------------------------------------------------------------------------------|
| <b>Order of DDR genes in Figure 2b</b>                                                                                                                                                                                                                                             |
| TDG, RAD9, UBE2A, HUS1, PMS1, NTHL1, TRPC2, MIF, TRP53, GTF2H1, RAD1, GADD45A, RAD9B, MLH1, XPC, POLI, RAD17, RAD51L1, RAD52, RAD21, RAD23A, RBM4, MGMT, OGG1, GTFH2, BRCA2, POLH, XRN2, REV1, H2AFX, MSH2, WRNIP1, PARP2, XRCC1, DCLRE1A, PARP1, ERCC1, SUMO, RAD51C, MARE, XRCC6 |
| <b>Order of DDR genes in Figure 2c</b>                                                                                                                                                                                                                                             |
| MRE11A, POLD3, XRCC3, SLK, SMC3, TLK1, ATRX, TERF1, MSH3, PRKDC, XRCC2, APEX1, ATM, MUTYH, SMC1A, WRN, MLH3, UNG, CRY2, LIG1, POLD1, RAD50, PTTG1, MPG, TREX, FANCG, XPA, MBD4, PMS2, FEN1, FANCC, RAD18, CHAF1A, POLE, RAD51, CHEK1, EXO1, BRCA1                                  |

# Supplementary Figure S6

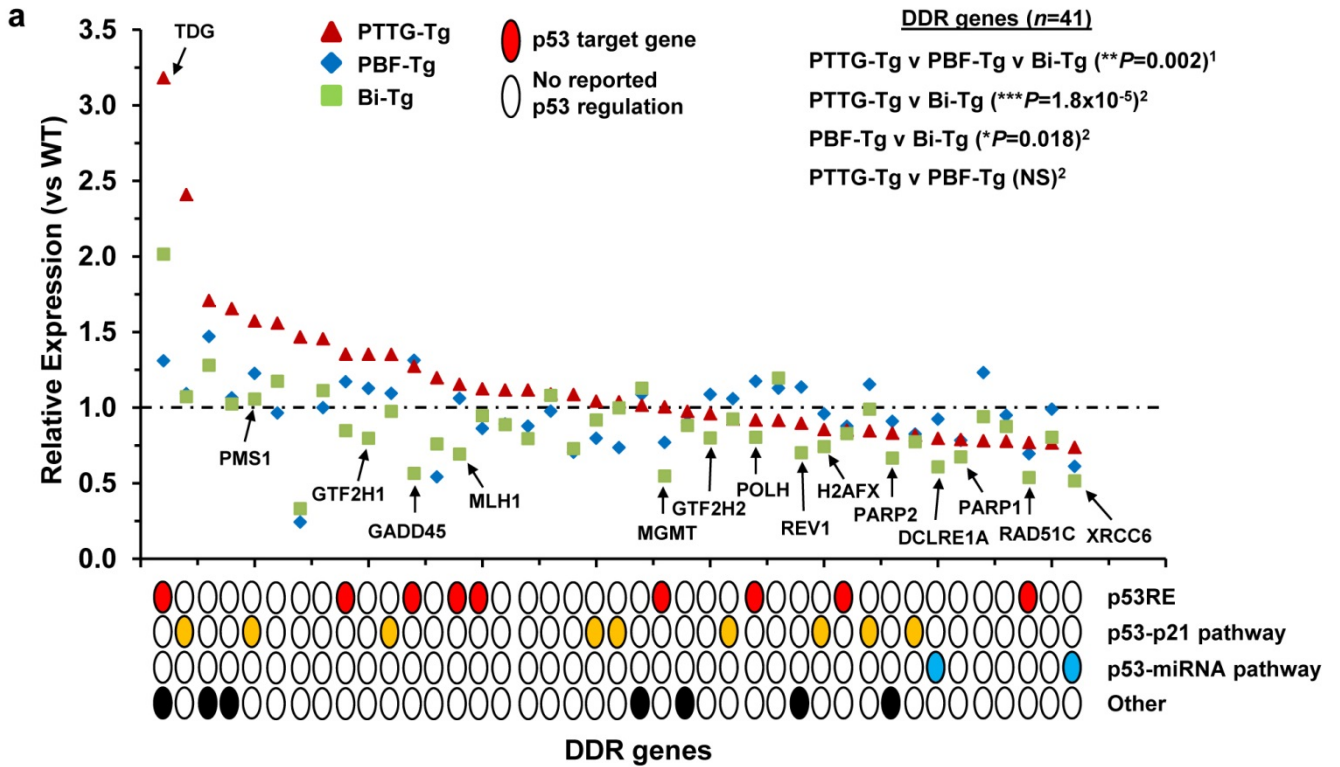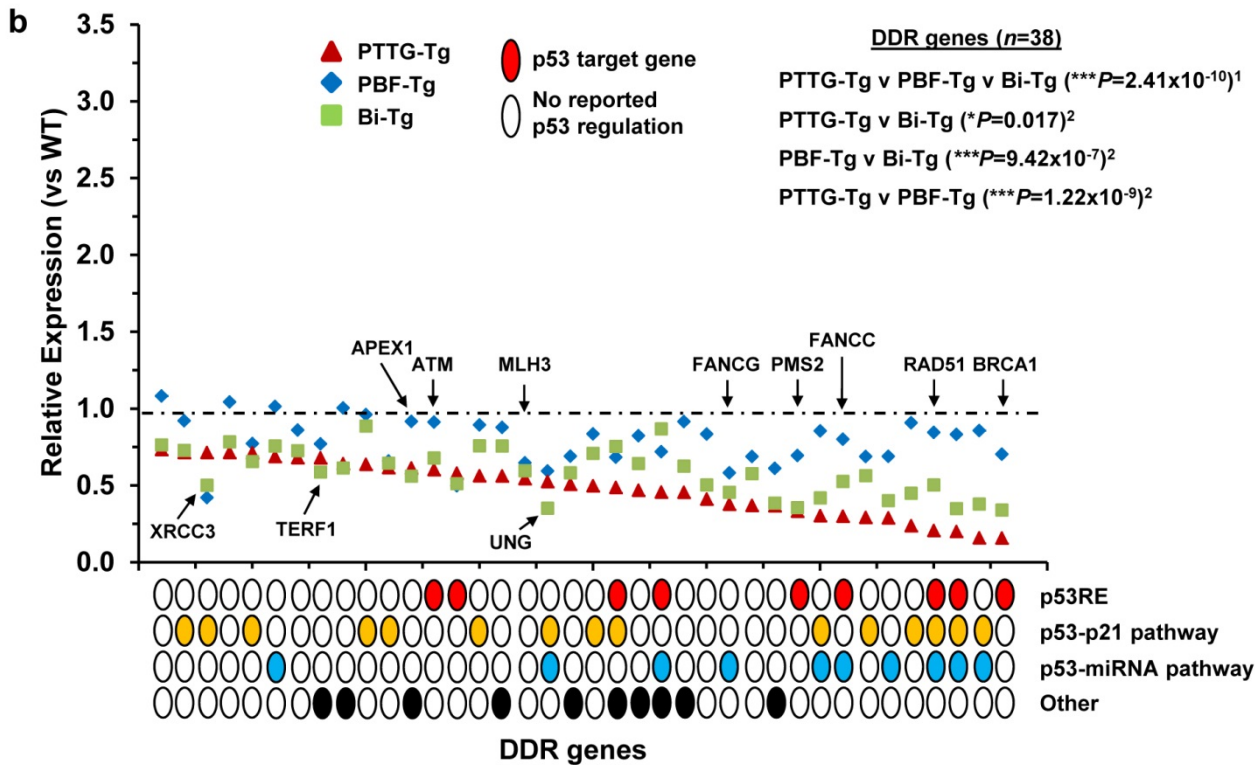

**c** Order of DDR genes. *Upper-* TDG, RAD9, UBE2A, HUS1, PMS1, NTHL1, TRPC2, MIF, TRP53, GTF2H1, RAD1, GADD45, RAD9B, MLH1, XPC, POLI, RAD17, RAD51L1, RAD52, RAD21, RAD23A, RBM4, MGMT, OGG1, GTFH2, BRCA2, POLH, XRN2, REV1, H2AFX, MSH2, WRNIP1, PARP2, XRCC1, DCLRE1A, PARP1, ERCC1, SUMO, RAD51C, MARE, XRCC6  
*Lower-* MRE11A, POLD3, XRCC3, SLK, SMC3, TLK, ATRX, TERF1, MSH3, PRKDC, XRCC2, APEX1, ATM, MUTYH, SMC1A, WRN, MLH3, UNG, CRY2, LIG1, POLD1, RAD50, PTTG1, MPG, TREX1, FANCG, XPA, MBD4, PMS2, FEN1, FANCC, RAD18, CHAF1A, POLE, RAD51, CHEK1, EXO1, BRCA1



# Supplementary Figure S7

**a** pChk1(Ser345)

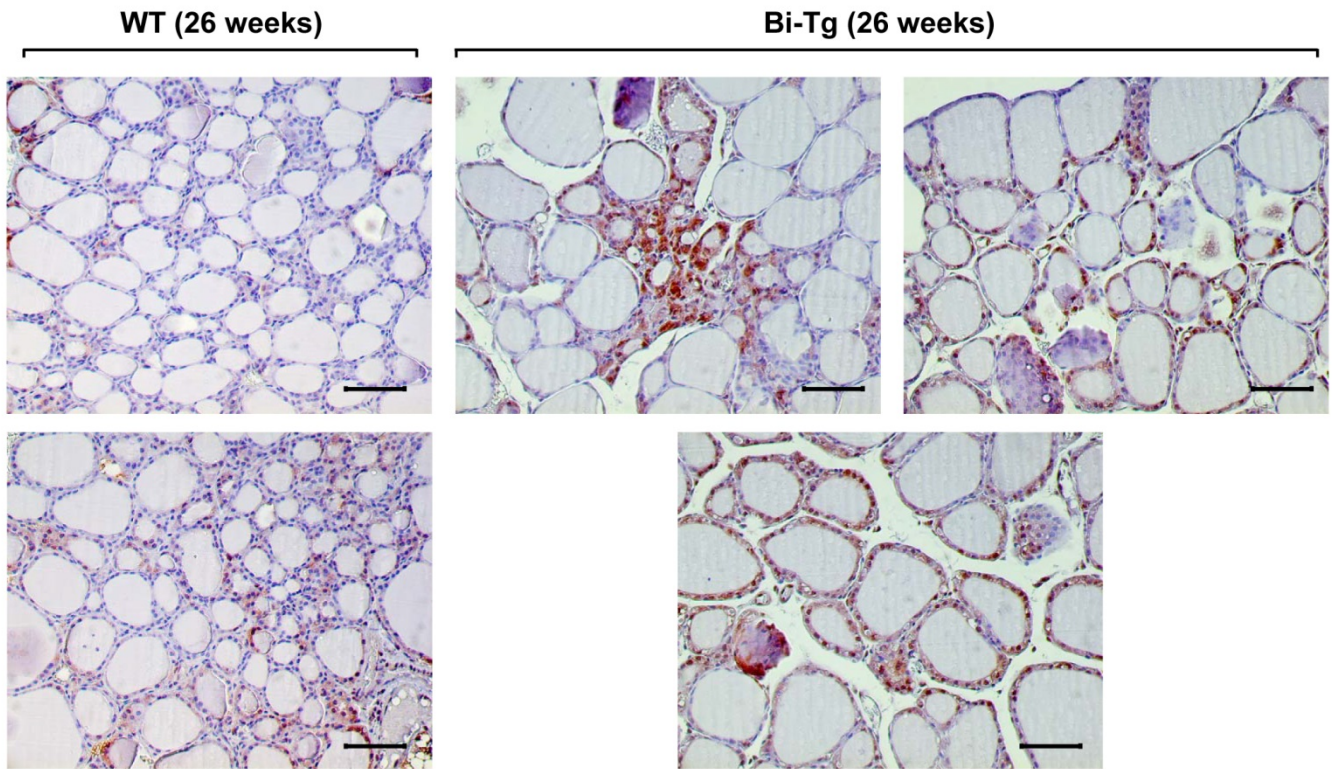

**b** pChk1(Ser345)

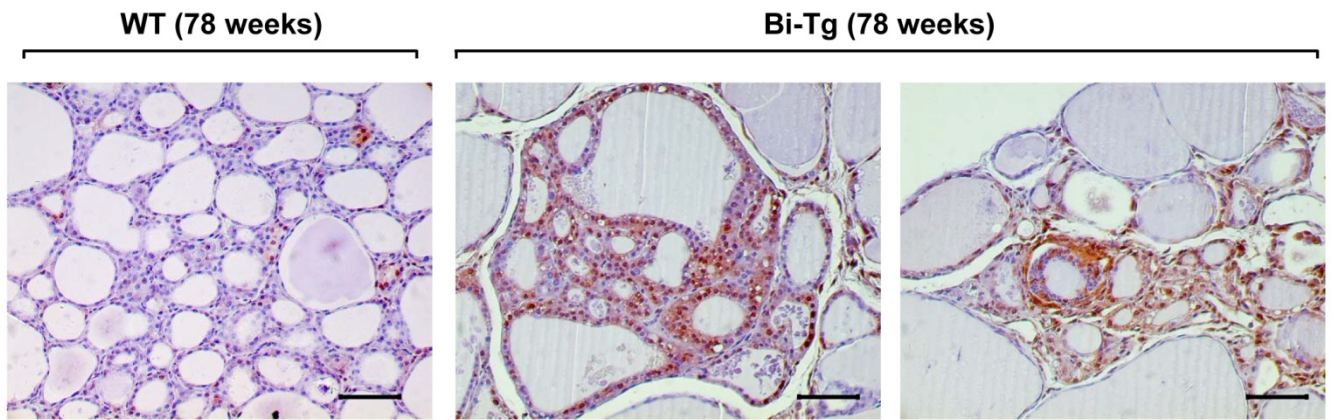

**c** pChk1(Ser345)

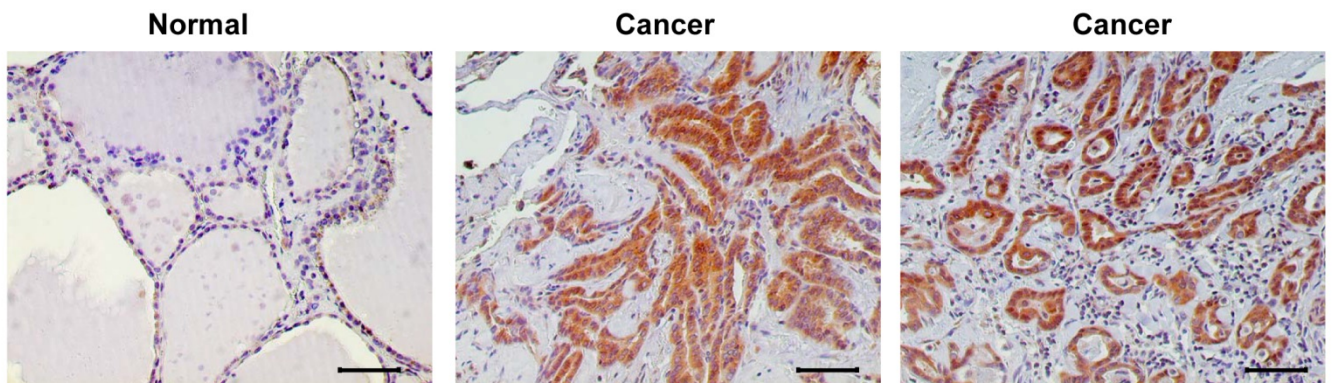

Supplement: NIHMS72326-supplement-Supplementary_Figure_S5-S7.pdf [file NIHMS72326-supplement-Supplementary_Figure_S5-S7.pdf]
