# Supplementary material
Source: PubMed Central journal article supplement (PMC5563453)
Supplement: NIHMS72326-supplement-Supplementary_Figure_S8-S23.pdf [file NIHMS72326-supplement-Supplementary_Figure_S8-S23.pdf]

## Supplementary Figure S8

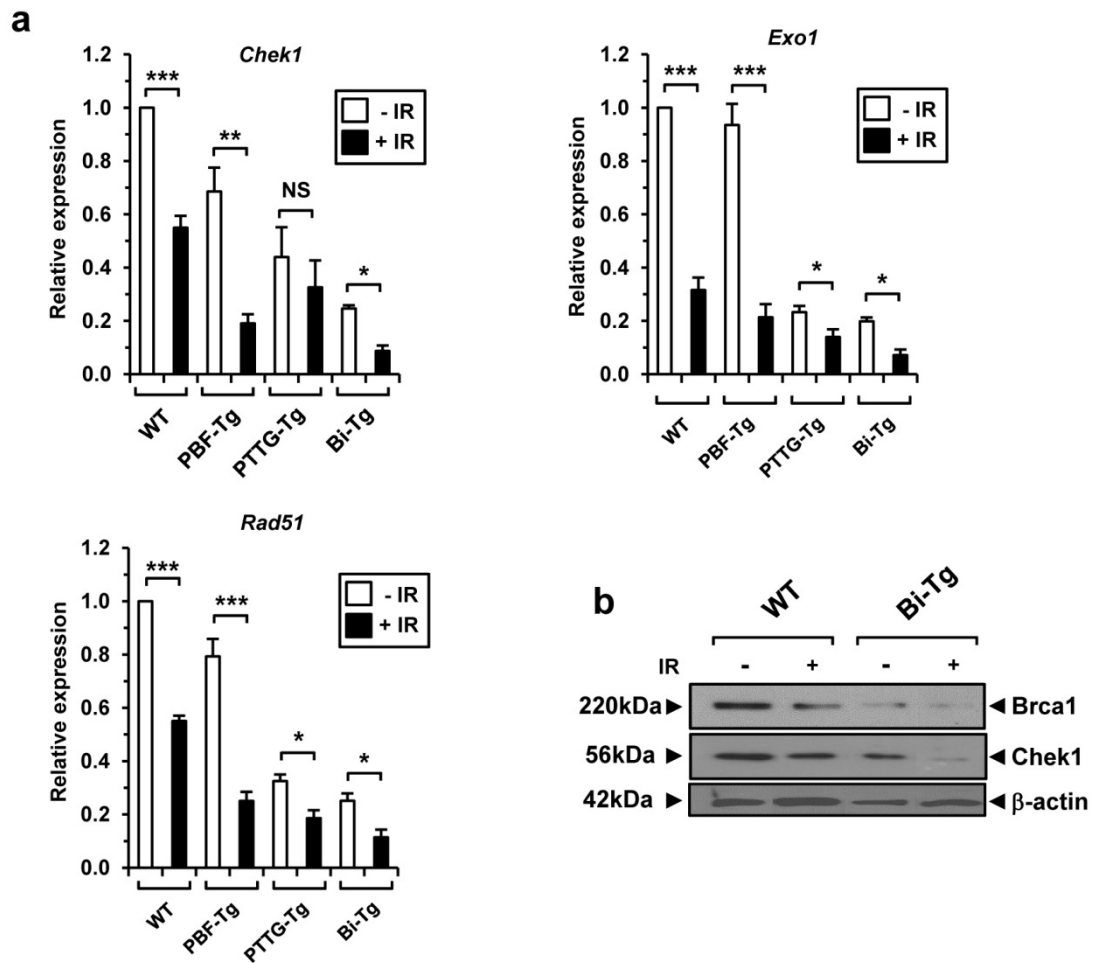

**Supplementary Figure S8.** Effect of genotype and irradiation on DDR gene expression in primary thyrocytes. **(a)** Relative fold changes in *Chek1*, *Rad51* and *Exo1* expression in irradiated (+IR) thyrocytes of each genotype (WT, PBF-Tg, PTTG-Tg and Bi-Tg) versus non-irradiated (-IR) controls. (mean±s.e.m.,  $n=4$ , unpaired two-tailed  $t$ -test) (NS, not significant;  $*P<0.05$ ;  $**P<0.01$ ;  $***P<0.001$ ). **(b)** Western blot analysis of Brca1 and Chek1 in WT and Bi-Tg primary thyrocytes either non-irradiated (-) or irradiated (+). Blot shown is representative from at least 3 independent experiments.

## Supplementary Figure S9

a TPC-1 (- IR)

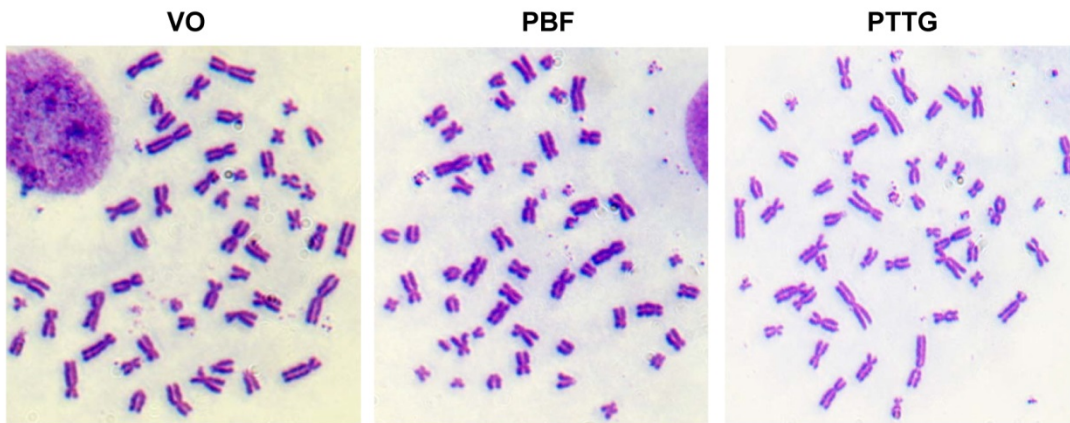

b TPC-1

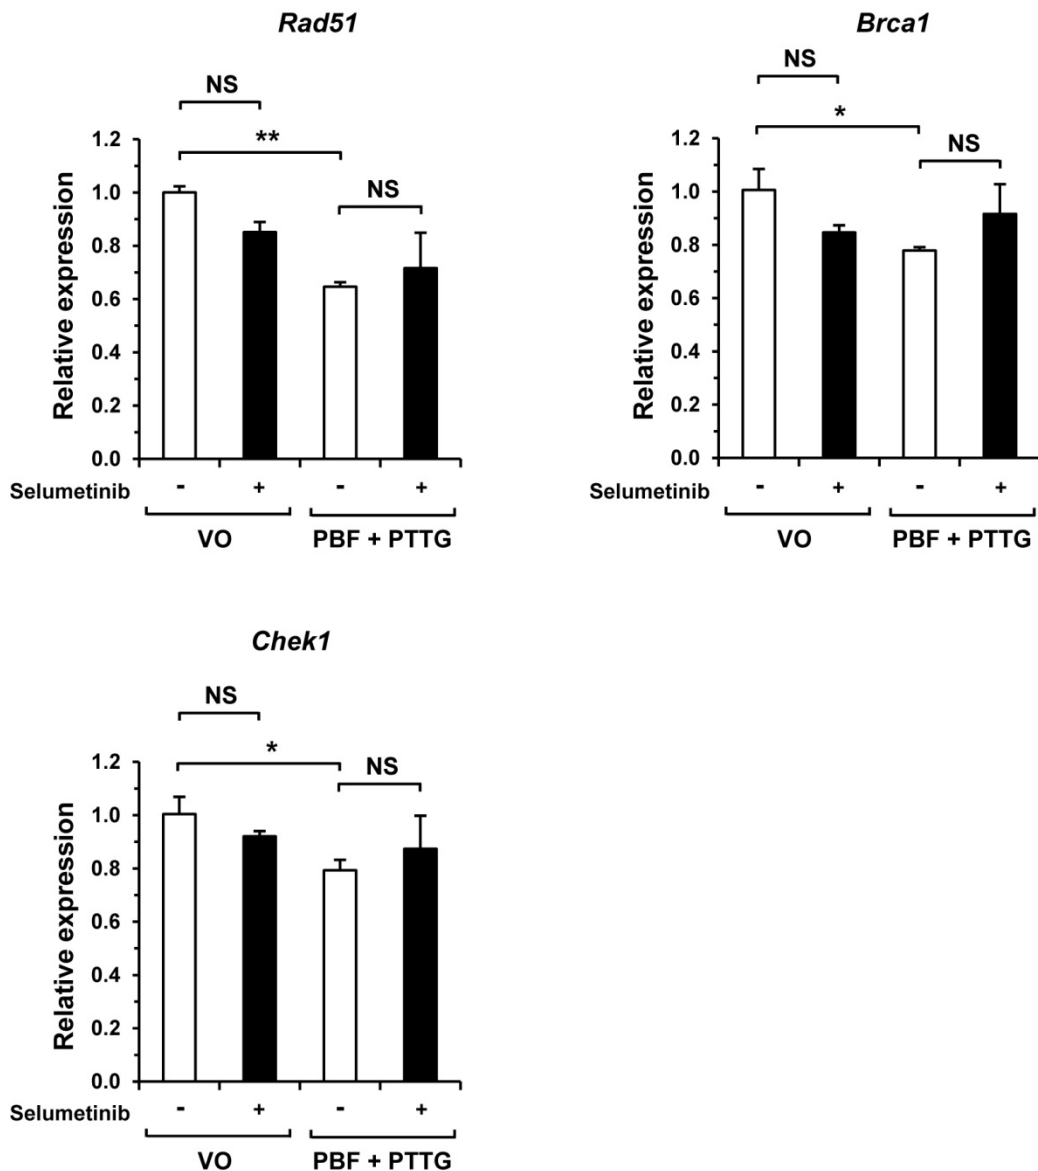

**Supplementary Figure S9.** Chromosomal aberrations and DDR gene expression in TPC-1 cells. (a) Representative metaphase spreads of TPC-1 cells transfected with VO, PBF or PTTG for 48 h prior to analysis. (b) Relative fold changes in *Rad51*, *Brca1* and *Chek1* expression in TPC-1 cells transfected with either VO or PBF + PTTG and then incubated with 200 nM selumetinib (mean±s.e.m.,  $n=3$ , unpaired two-tailed  $t$ -test) (NS, not significant;  $*P<0.05$ ;  $**P<0.01$ ).

# Supplementary Figure S10

## a Matched tumour/normal TCGA thyroid dataset (n=59)

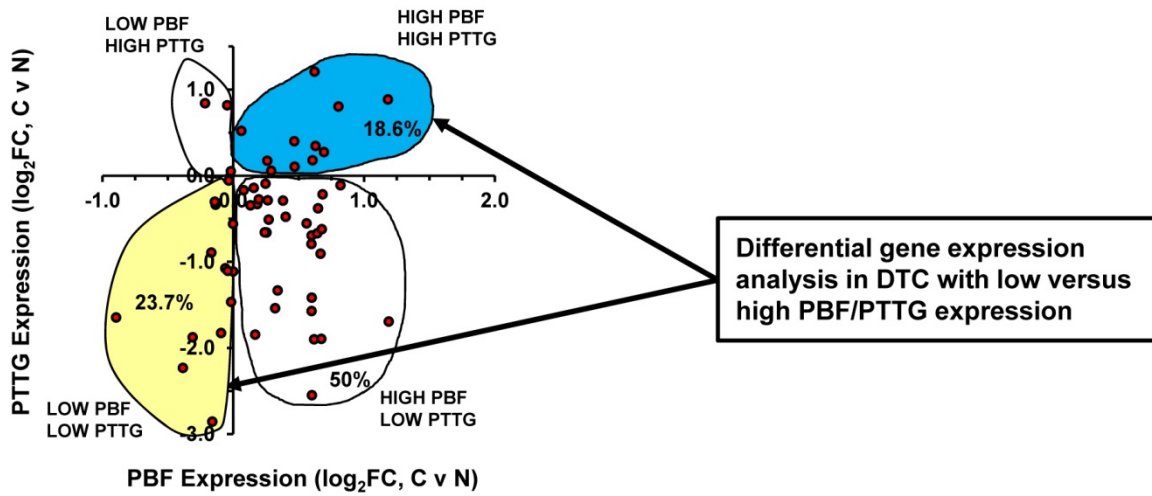

## b

| Panther Pathway (Genes 1-3000; <i>P</i> <0.005)          | P-Value | Genes                                                                                                                                                                                                                                                                      |
|----------------------------------------------------------|---------|----------------------------------------------------------------------------------------------------------------------------------------------------------------------------------------------------------------------------------------------------------------------------|
| p53 pathway feedback loops 2                             | 0.0097  | PDPK1, SMG1, MAPK11, MAPK14, PTENP1, PIK3CA, PIK3CB, PIK3C2A, PIK3C2B, PIK3C3, PPM1D, RRAS, RBL1, <u>ATM</u> , <u>PRKDC</u> , TALDO1, HRAS                                                                                                                                 |
| p53 pathway                                              | 0.043   | PDPK1, BAX, CREBBP, EP300, KAT2B, MYST3, MYST4, PERP, SIN3A, SMG1, SUMO1P3, SUMO2, PTENP1, PIK3CA, PIK3CB, PIK3C2A, PIK3C2B, PPM1D, <u>ATM</u> , <u>WRN</u> , <u>PRKDC</u> , SIRT1, SIRT6, SFN                                                                             |
| REACTOME Pathway (Genes 1-3000 genes; <i>P</i> <0.005)   | P-Value | Genes                                                                                                                                                                                                                                                                      |
| DNA Repair                                               | 0.0039  | <u>APEX1</u> , FANCM, MAD2L2, <u>MRE11A</u> , <u>MPG</u> , <u>MGMT</u> , <u>REV1</u> , REV3L, <u>XRCC6</u> , ALKBH2, CCNH, CDK7, ERCC1, ERCC4, MDC1, <u>NTHL1</u> , POLD4, POLR2A, POLR2F, POLR2G, POLR2I, POLR2J, POLR2K, POLR2L, RFC1, <u>ATM</u> , <u>PRKDC</u> , TP531 |
| REACTOME Pathway (Genes 3001-6000 genes; <i>P</i> <0.05) | P-Value | Genes                                                                                                                                                                                                                                                                      |
| DNA Repair                                               | 0.016   | <u>FANCC</u> , <u>RAD50</u> , ALKBH3, <u>BRCA1</u> , BRCA2, ERCC6, ERCC8, <u>GTF2H1</u> , GTF2H3, GTF2H4, LIG3, NBN, POLB, <u>POLH</u> , <u>POLD3</u> , POLR2B, POLR2E, RFC2, RPA1, RPA2, RPA3, SMUG1, TCEA1, USP1, UBE2T                                                  |

**Supplementary Figure S10.** Differentially expressed genes in human DTC with low vs high PBF/PTTG expression. (a) Scatterplot showing fold-change (FC) in PBF and PTTG expression in DTC vs matched normal samples (log<sub>2</sub>, n=59, TCGA dataset). Shaded areas indicate DTC samples with low (yellow) and high (blue) PBF/PTTG expression. (b) Panther (upper) and Reactome (lower) analysis using DAVID to identify p53 pathway and DNA repair genes differentially expressed in low vs high PBF/PTTG-expressing thyroid tumours. Gene categories and their respective *P*-values are indicated (modified Fisher's exact test). Several genes (underlined) identified by DAVID were previously found to be significantly repressed in murine Bi-Tg thyrocytes (Figure 2a and Supplementary Figure S5a).

# Supplementary Figure S11

## Panther pathway analysis using unmatched TCGA thyroid dataset

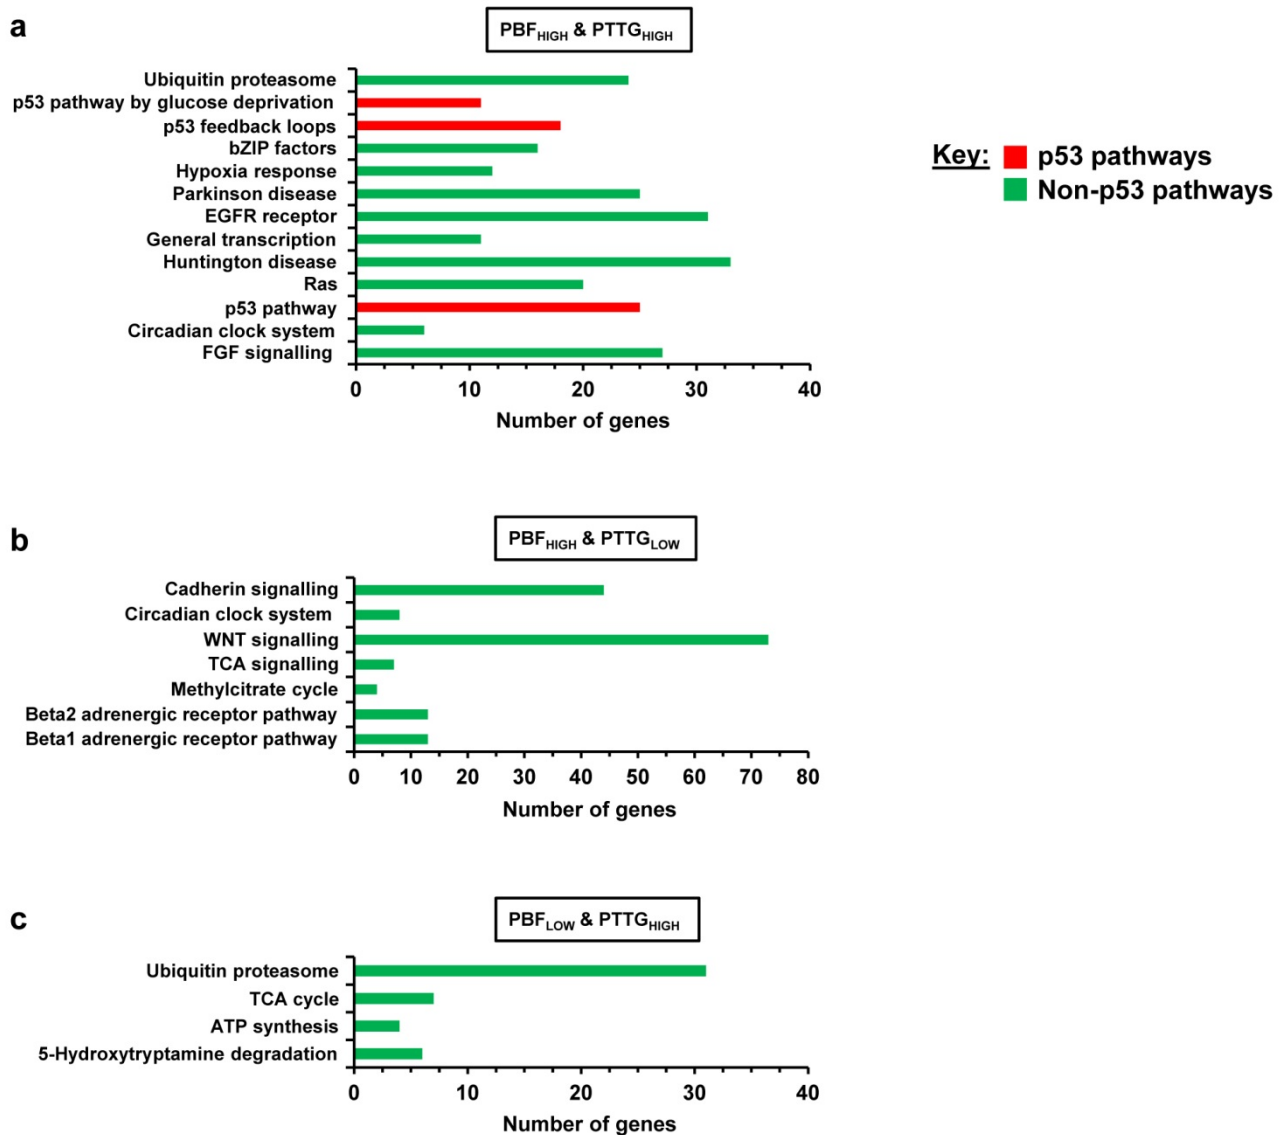

**Supplementary Figure S11.** Enrichment of p53 pathway genes identified by DAVID analysis is specific to DTC with elevated expression of PBF and PTTG. **(a)** DAVID analysis of differentially expressed genes in the unmatched TCGA dataset comparing DTC samples with high PBF/high PTTG tumoural expression ( $n=25$ ) and low PBF/low PTTG tumoural expression ( $n=28$ ). Gene categories enriched for p53 pathway genes are highlighted in red.  $P < 0.05$  for all subgroups (modified Fisher's exact test). **(b)** Same as (a) but comparing DTC samples with high PBF/low PTTG tumoural expression ( $n=19$ ) and low PBF/low PTTG tumoural expression ( $n=28$ ). **(c)** Same as (a) but comparing DTC samples with low PBF/high PTTG tumoural expression ( $n=7$ ) and low PBF/low PTTG tumoural expression ( $n=28$ ).

## Supplementary Figure S12

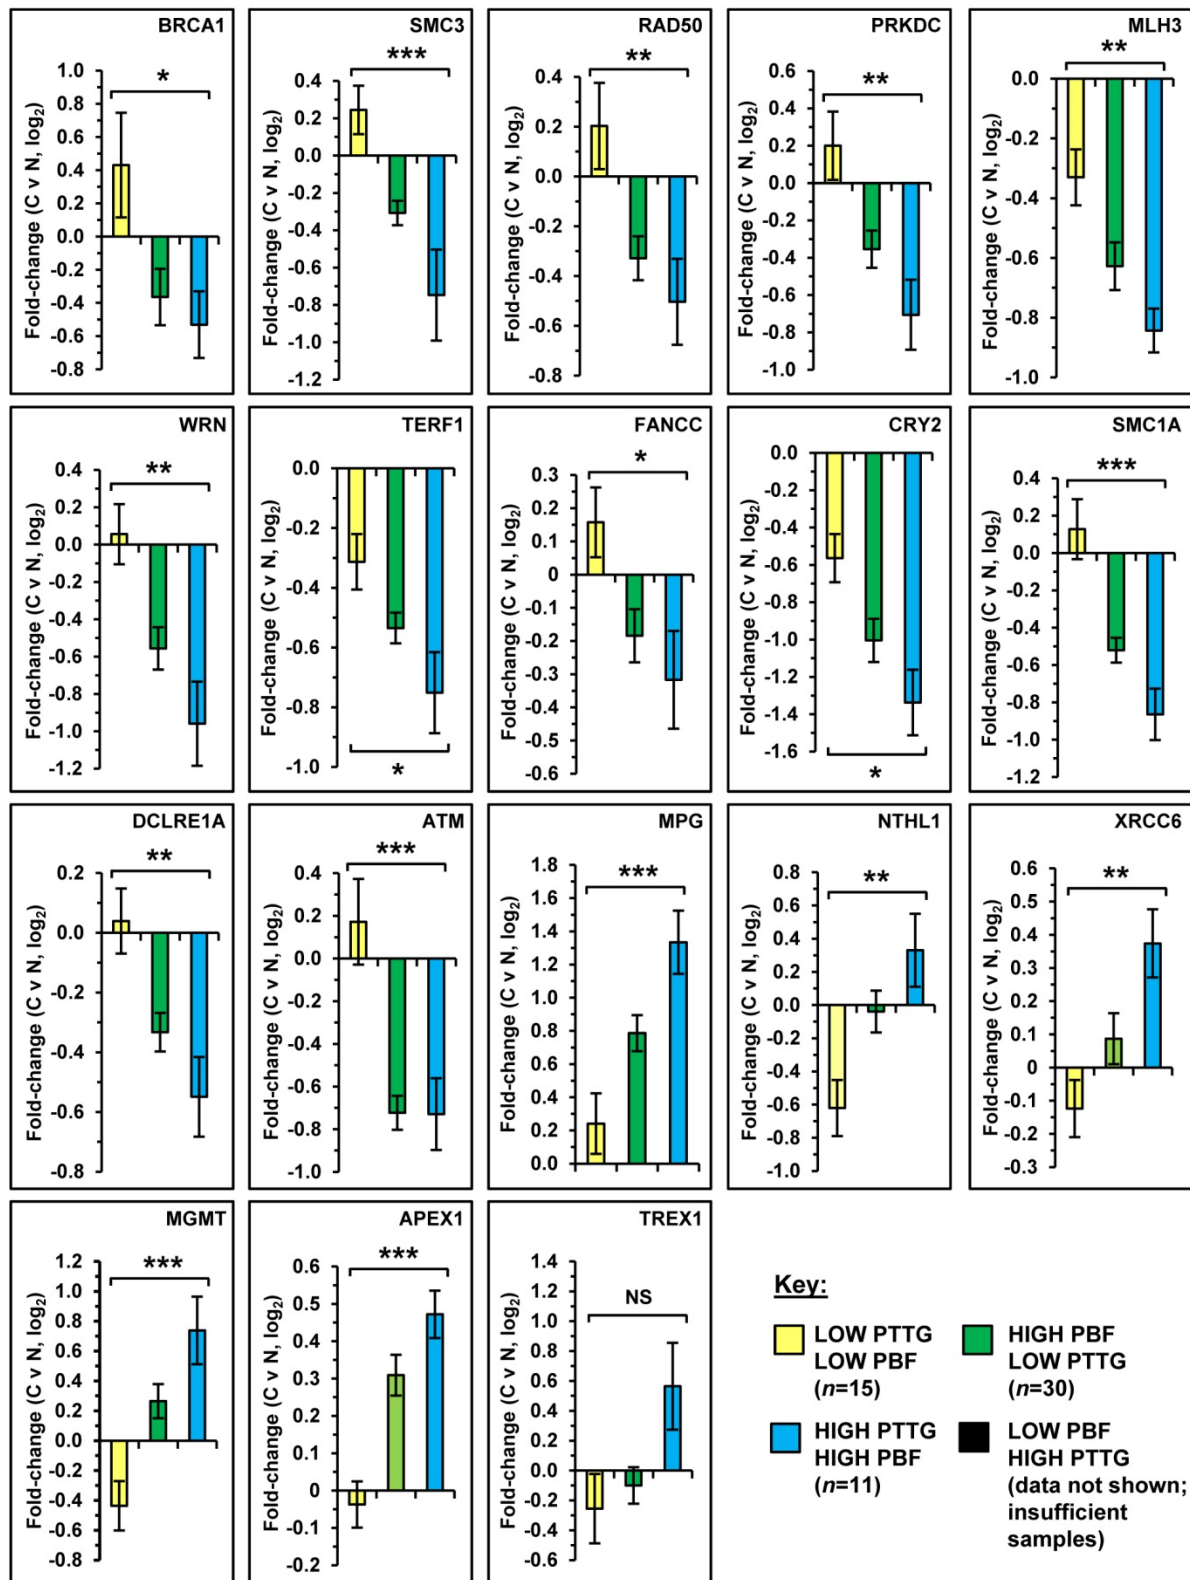

**Supplementary Figure S12.** Modulation of DDR genes in DTC with different subsets of PBF and PTTG expression. Fold-change in expression for a panel of 18 DDR genes is shown using matched thyroid tumour and normal samples with low PBF/low PTTG ( $n=15$ , yellow), high PBF/low PTTG ( $n=30$ , green) and high PBF/high PTTG ( $n=11$ , blue) expression (mean  $\log_2FC \pm s.e.m.$ , Kruskal-Wallis test) (NS, not significant; \* $P < 0.05$ ; \*\* $P < 0.01$ ; \*\*\* $P < 0.001$ ). Gene expression data for DTC samples with low PBF/high PTTG was not shown due to insufficient samples. The relative fold-change in expression for DTC samples with high PBF/high PTTG was significantly greater than the subset with high PBF/low PTTG for 8 DDR genes (i.e. SMC3, PRKDC, WRN, SMC1A, MPG, MGMT, APEX1, TREX1;  $P < 0.05$ ; Mann-Whitney test; 1-tailed).



# Supplementary Figure S13

## Matched tumour/normal TCGA dataset

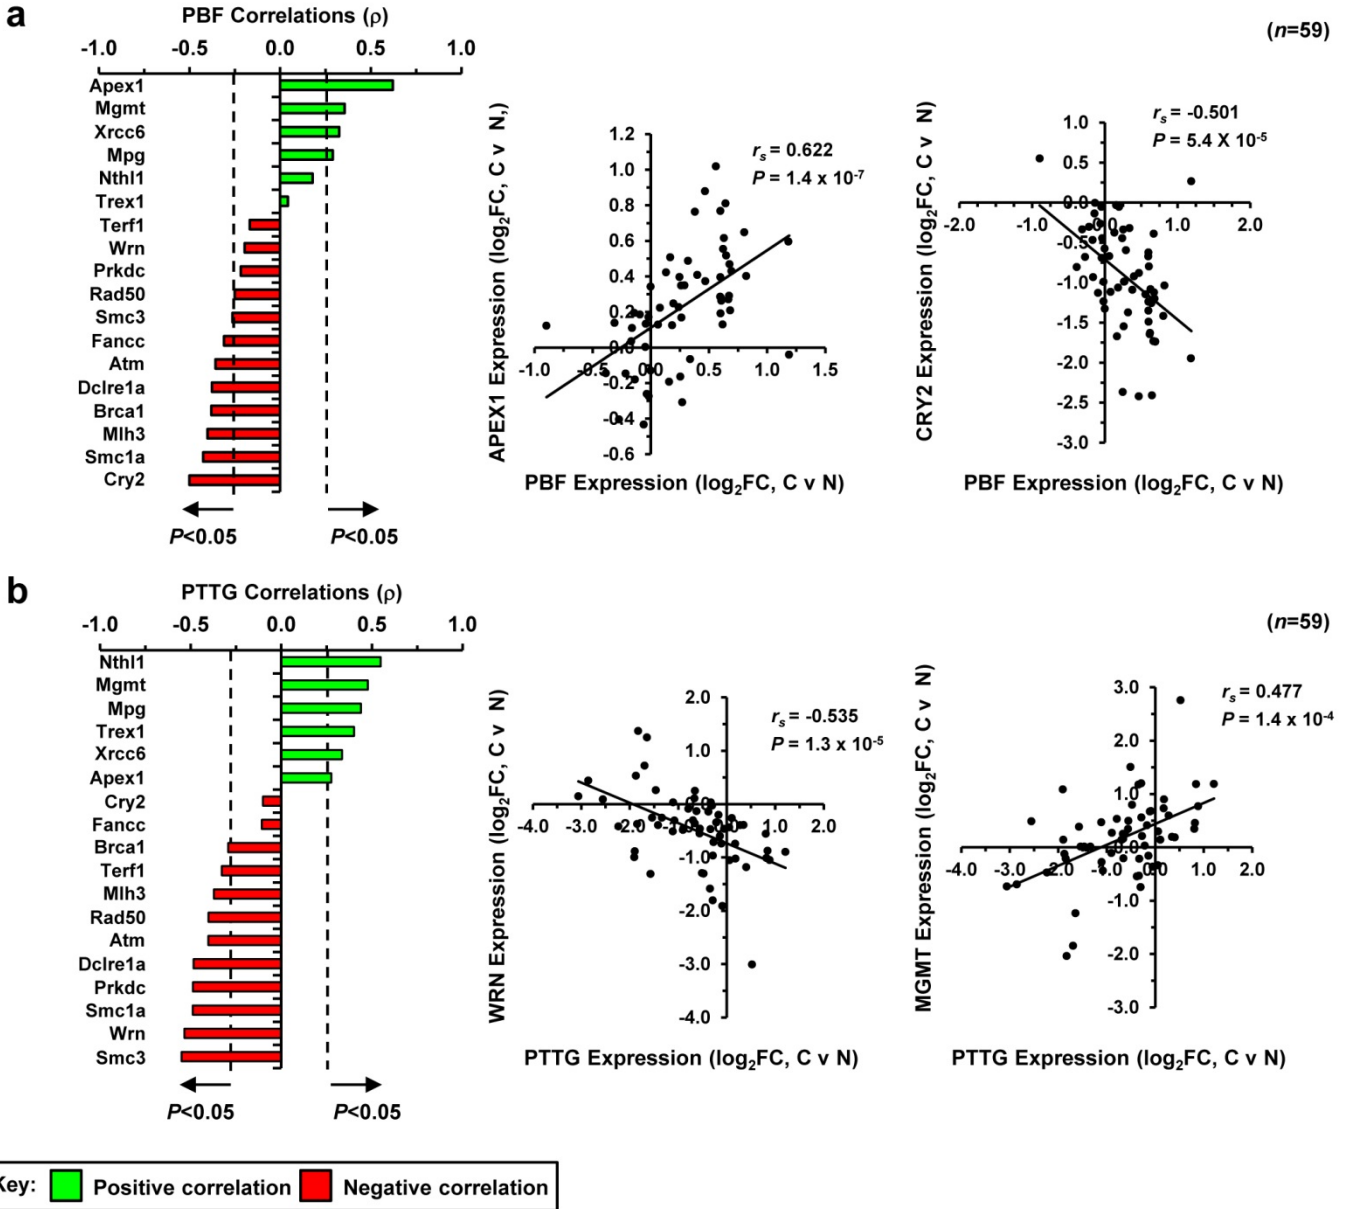

**Supplementary Figure S13.** Correlation of DDR genes with PBF and PTTG expression in human DTC. **(a-b)** Correlation of PBF (a) and PTTG (b) expression with 18 DDR genes in matched DTC/normal samples ( $n=59$ ).  $P$  and  $\rho$  values were calculated using Spearman's correlation tests. Representative scatterplots showing significant correlations for fold-change (FC) in *Apex1*, *Cry2*, *Wrn* and *Mgmt* expression with either PBF (a) or PTTG (b) are shown on right.

# Supplementary Figure S14

Unmatched DTC dataset ( $n=322$ )

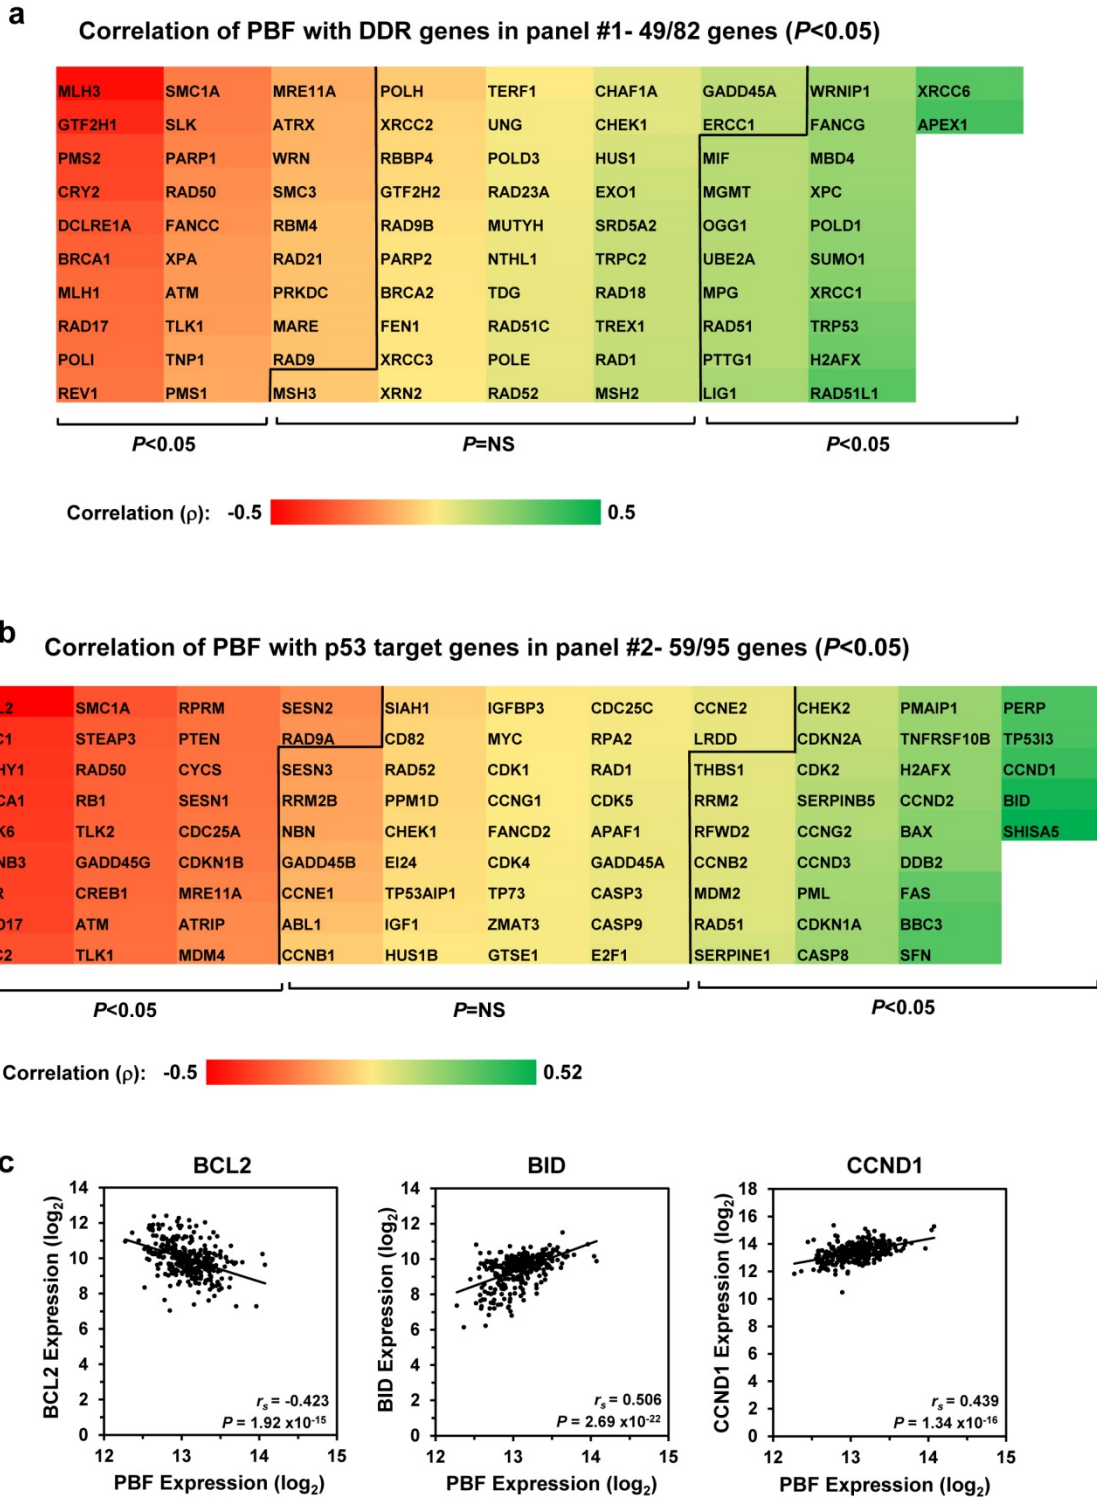

**Supplementary Figure S14.** Correlation of PBF expression in DDR and p53 target gene panels. (a) Heatmap showing relative correlation values ( $\rho$ ) for PBF expression with a panel (#1) of 82 DDR genes using TCGA data ( $n=322$  unmatched DTC samples). Significant correlations ( $*P<0.05$ ) were observed with PBF for ~60% of DDR genes ( $n=49/82$  genes).  $P$  and  $\rho$  values were calculated using the Spearman's correlation test. (b) Heatmap showing relative correlation values ( $\rho$ ) for PBF expression with a panel (#2) of 95 p53 target genes using TCGA data ( $n=322$  unmatched DTC samples). Significant correlations ( $*P<0.05$ ) were observed with PBF for 62% of p53 target genes ( $n=59/95$  genes; Spearman's correlation test). (c) Representative scatterplots showing significant correlations for expression of *BCL2*, *BID* and *CCND1* with PBF ( $n=322$ ; Spearman's correlation test). Further information on gene panel #1 and #2 is provided in Supplementary Table S1.

# Supplementary Figure S15

Unmatched DTC dataset ( $n=322$ )

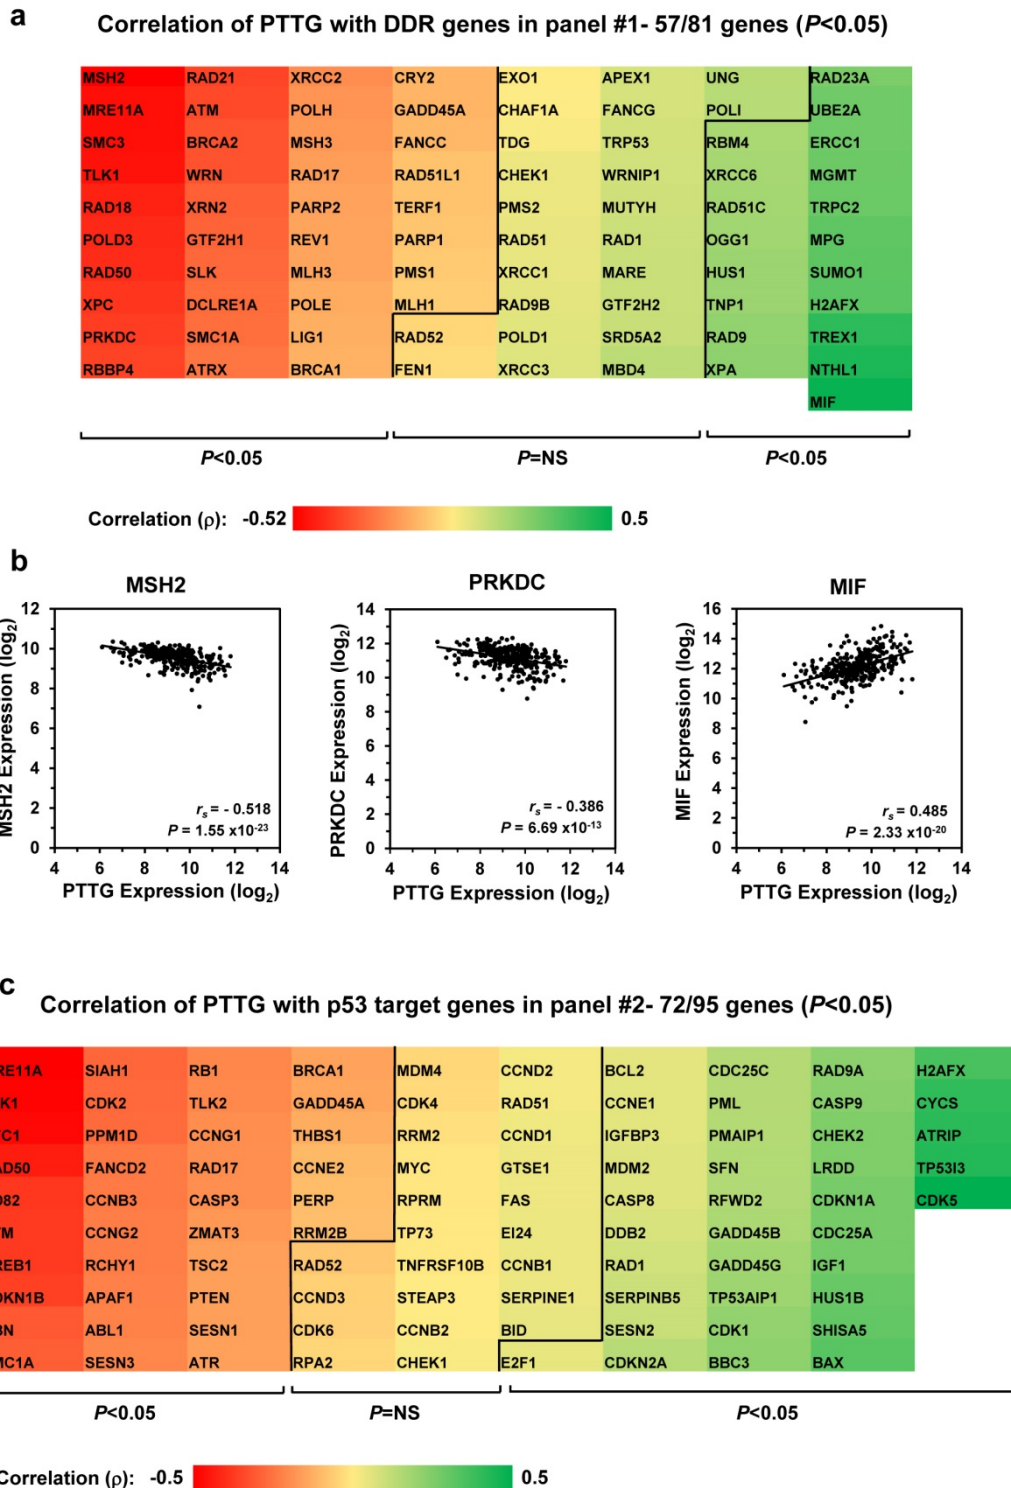

**Supplementary Figure S15.** Correlation of PTTG expression in DDR and p53 target gene panels. (a) Heatmap showing relative correlation values ( $\rho$ ) for PTTG expression with a panel (#1) of 81 DDR genes using TCGA data ( $n=322$  unmatched DTC samples). Significant correlations ( $*P<0.05$ ) with PTTG were observed for 70.4% of DDR genes ( $n=57/81$  genes).  $P$  and  $\rho$  values were calculated using the Spearman's correlation test. (b) Representative scatterplots showing significant correlations for expression of *MSH2*, *PRKDC* and *MIF* with PTTG ( $n=322$ ; Spearman's correlation test). (c) Heatmap showing relative correlation values ( $\rho$ ) for PTTG expression with a panel (#2) of 95 p53 target genes using TCGA data ( $n=322$  unmatched DTC samples). Significant correlations ( $*P<0.05$ ) with PTTG were observed for 75.8% of p53 target genes ( $n=72/95$  genes; Spearman's correlation test). Further information on gene panel #1 and #2 is provided in Supplementary Table S1.



## Supplementary Figure S16

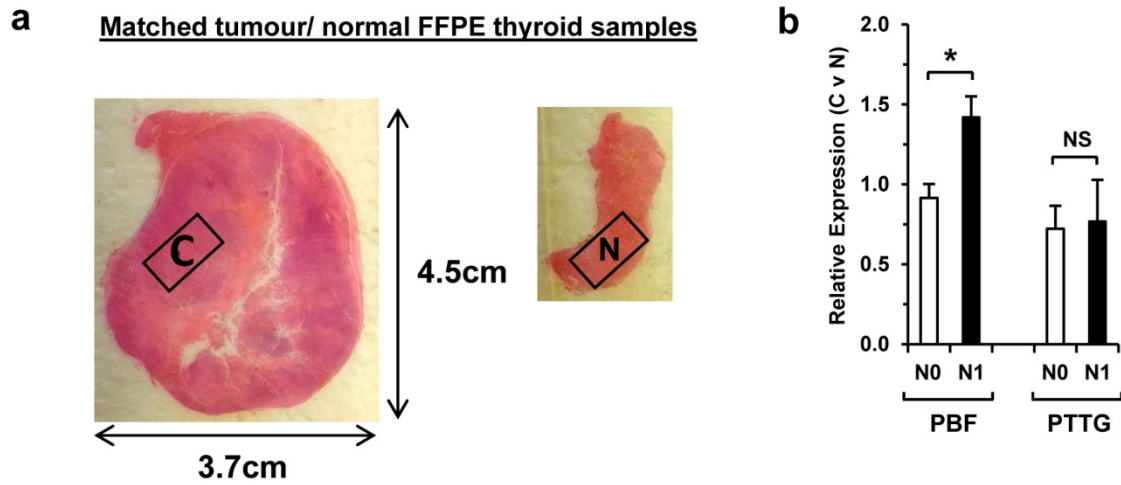

**Supplementary Figure S16.** Association of metastatic DTC with increased PBF expression. **(a)** Representative H&E stained images of matched FFPE DTC (C) and normal (N) thyroid tissue. Boxed areas represent boundaries of tissue used for RNA extraction. **(b)** Quantification of relative PBF (N0,  $n=27$ ; N1,  $n=7$ ) and PTTG (N0,  $n=23$ ; N1,  $n=6$ ) mRNA expression in metastatic DTC (N1) and non-metastatic DTC (N0) relative to matched normal tissue (mean $\pm$ s.e.m., two-tailed Mann-Whitney test) (NS, not significant;  $*P<0.05$ ).

## Supplementary Figure S17

**a** pERK1/2

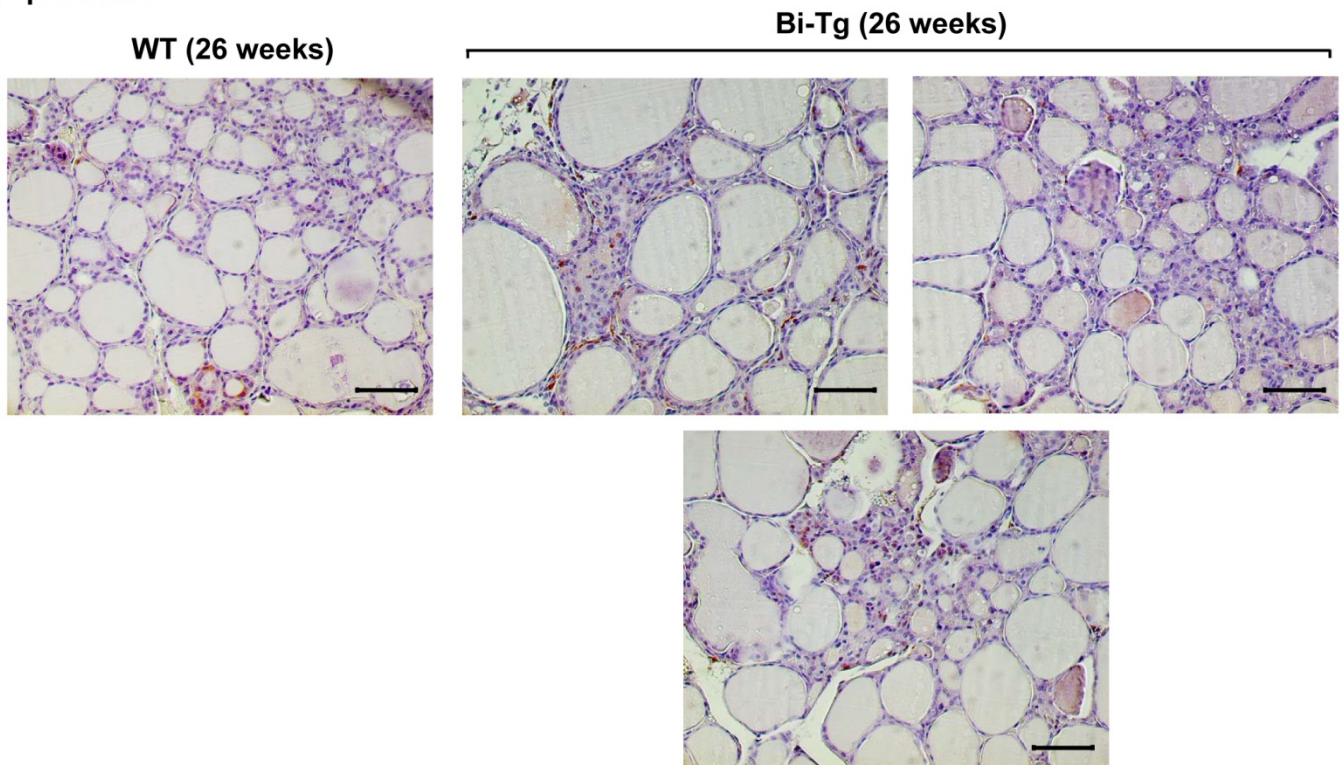

**b** pERK1/2

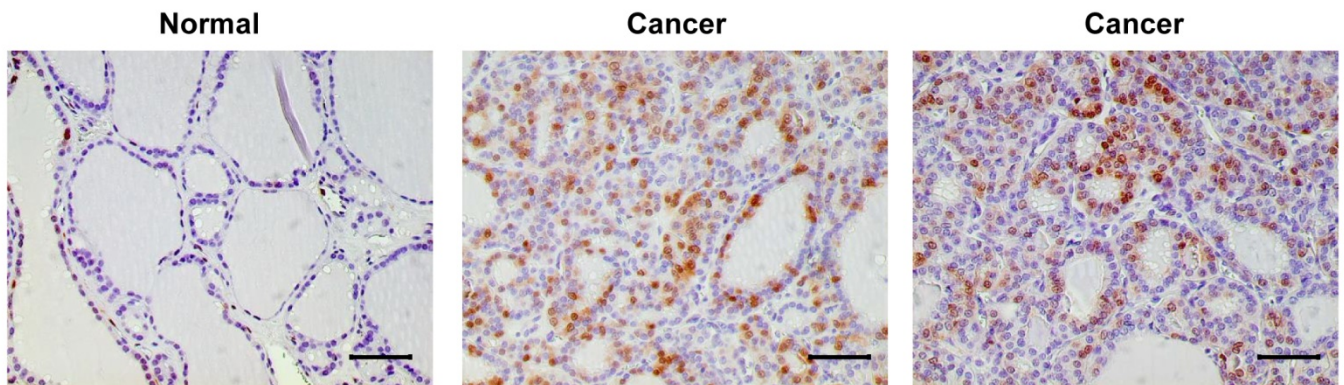

**Supplementary Figure S17.** Expression of pERK1/2 in thyroid tissue. **(a)** Representative images of pERK1/2 expression in wild-type (WT) and Bi-Tg thyroids in 26 week old mice. **(b)** Representative images of pERK1/2 expression in a human differentiated thyroid tumour (middle and right panels) and normal thyroid tissue (left panel). Scale bars, 100  $\mu$ m.

# Supplementary Figure S18

## Unmatched TCGA thyroid dataset

### Repressed DDR gene activity in DTC with high PBF/PTTG expression

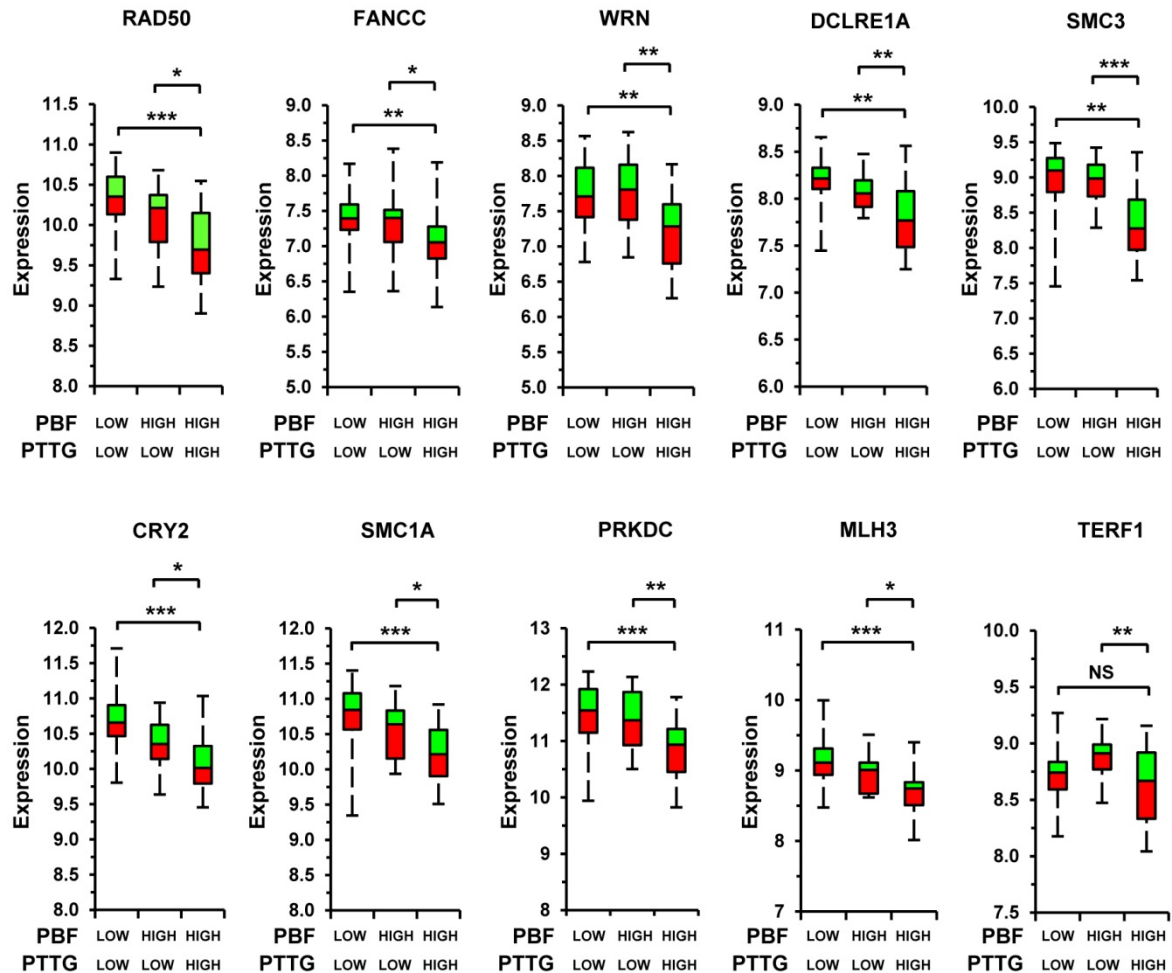

**Supplementary Figure S18.** Repressed DDR gene activity in DTC with high PBF/PTTG expression. Box-whisper plots showing relative expression of 10 DDR genes in unmatched DTC with different subsets of PBF and PTTG expression. *P*-values were determined by the Mann-Whitney test (median, PBF/PTTG expression groups: low/low, *n*=28; high/low, *n*=19; high/high, *n*=25) (\**P*<0.05; \*\**P*<0.01; \*\*\**P*<0.001). DTC samples with low PBF/high PTTG expression were not used due to insufficient numbers for meaningful and comparative analysis. Non-parametric analysis of DTC samples comparing the 3 subsets of PBF/PTTG expression also showed a significant difference for all 10 DDR genes (\*\**P*<0.01, Kruskal-Wallis test, analysis not shown).

# Supplementary Figure S19

Unmatched TCGA thyroid dataset

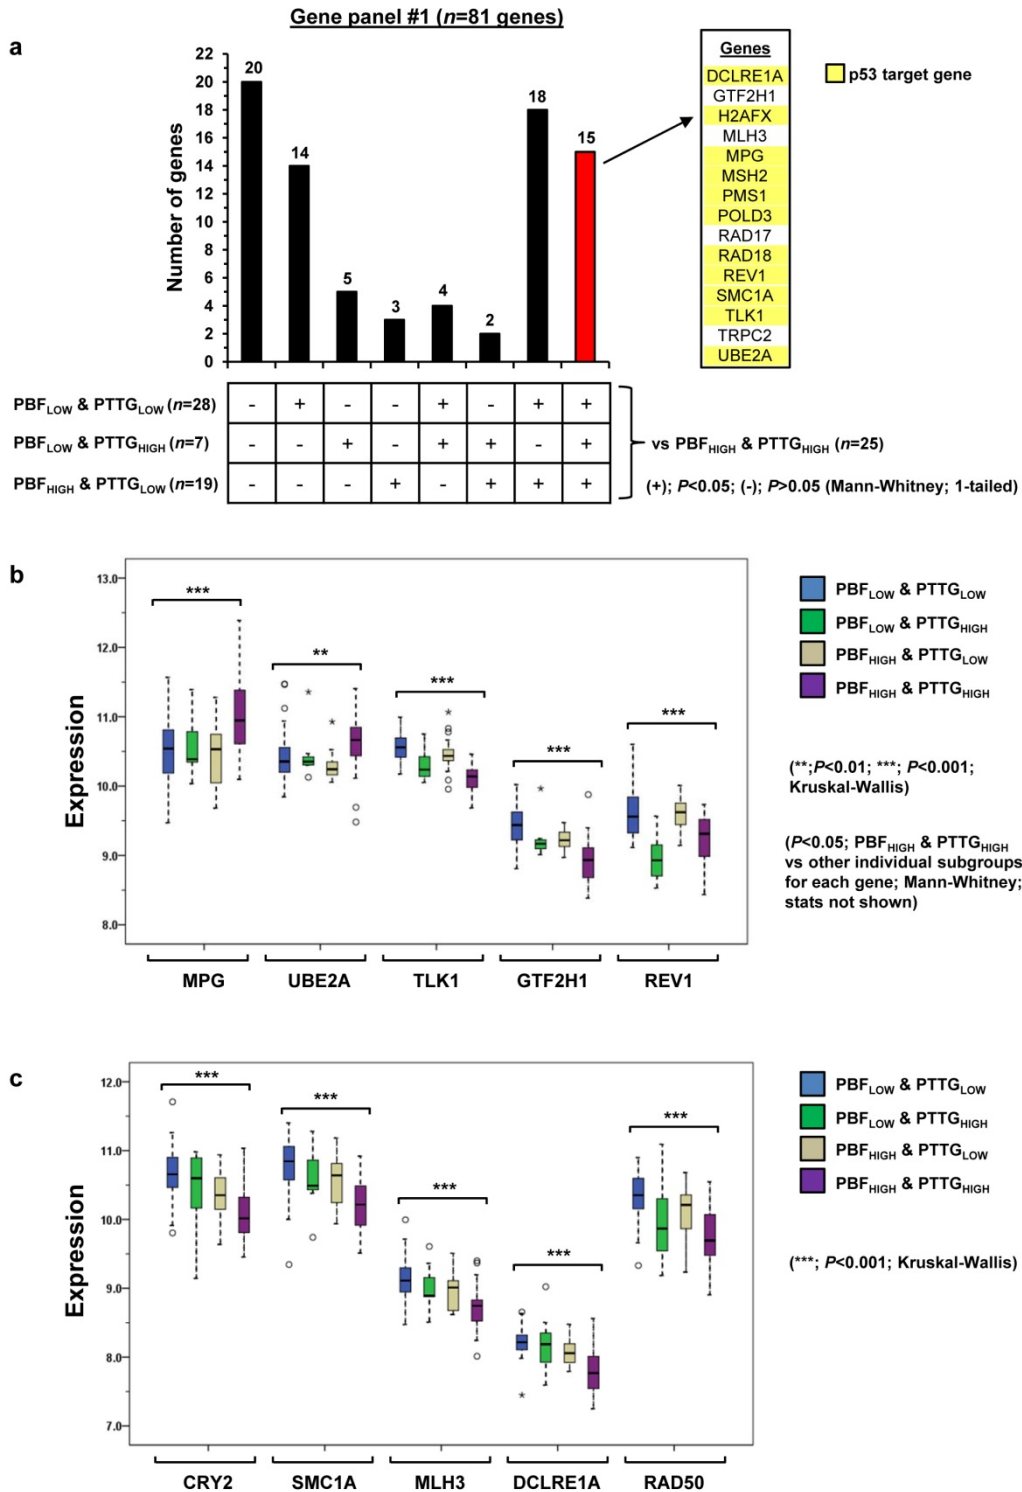

**Supplementary Figure S19.** DDR gene expression in unmatched DTC samples with different PBF/PTTG populations. (a) Graph summarises the number of DDR genes in panel #1 with expression levels significantly different in DTC with high PBF/high PTTG tumoural expression ( $n=25$ ) compared to the other three DTC populations [(i.e. low PBF/low PTTG ( $n=28$ ), low PBF/high PTTG ( $n=7$ ) and high PBF/low PTTG ( $n=19$ )]. Expression of 15 DDR genes in DTC with high PBF/high PTTG expression were significantly different than in the 3 other DTC populations as indicated. Of these 15 DDR genes, 11 were identified as p53 target genes and are highlighted in yellow (see Supplementary Table S1) (\*\* $P < 0.05$ , Mann-Whitney test; 1-tailed). (b-c) Example box-whisper plots for the indicated genes (i.e. MPG, UBE2A, TLK1, GTF2H1, REV1, CRY2, SMC1A, MLH3, DCLRE1A and RAD50) in DTC with different PBF/PTTG expression subsets as indicated (\*\* $P < 0.01$ ; \*\*\* $P < 0.001$ ; Kruskal-Wallis test).



# Supplementary Figure S20

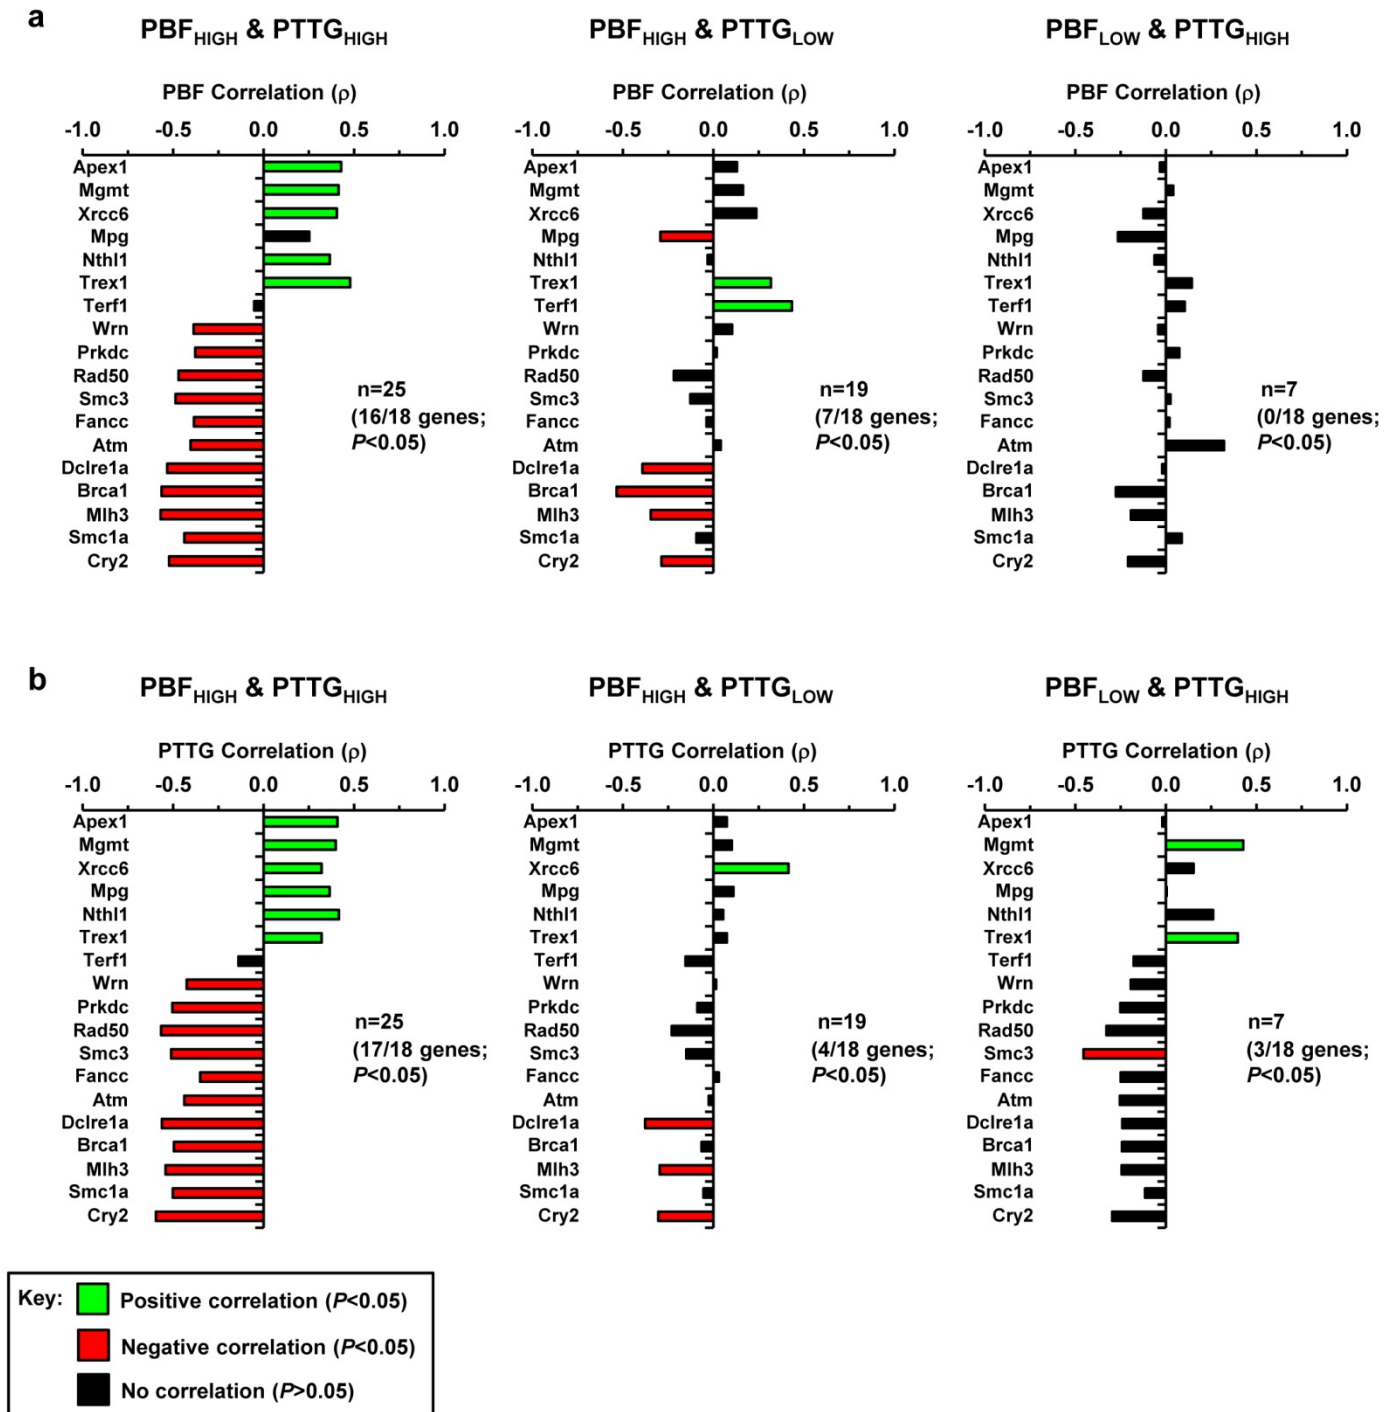

**Supplementary Figure S20.** Correlation of DDR genes in unmatched DTC samples with different PBF/PTTG populations. **(a)** Correlation of PBF expression with 18 DDR genes in unmatched DTC with both high PBF/high PTTG ( $n=25$ ) and low PBF/low PTTG expression ( $n=28$ ; 53 DTC samples in total).  $P$  and  $\rho$  values were calculated using Spearman's correlation tests;  $*P<0.05$ . Correlations were further determined in DTC with both high PBF/low PTTG and low PBF/low PTTG expression (middle panel;  $n=19$ ; 47 DTC samples in total), as well as in DTC with both low PBF/high PTTG and low PBF/low PTTG expression (right panel;  $n=7$ ; 35 DTC samples in total). **(b)** Same as (a) but correlation of PTTG expression was determined for 18 DDR genes in DTC samples. The majority of correlations were unique to DTC with high PBF/high PTTG expression (i.e. 11/16 genes for PBF and 14/17 genes for PTTG). Although in a few cases overexpression of one proto-oncogene appeared responsible for the correlation. There was significant correlation of PTTG, for instance, with three genes (MGMT, SMC3 and TREX1) in the low PBF/high PTTG population as well as in the high PBF/high PTTG population. In addition, there was a significant correlation of PBF with five genes (BRCA1, CRY2, DCLRE1A, MLH3 and TREX1) in the high PBF/low PTTG population as well as in the high PBF/high PTTG population.



# Supplementary Figure S21

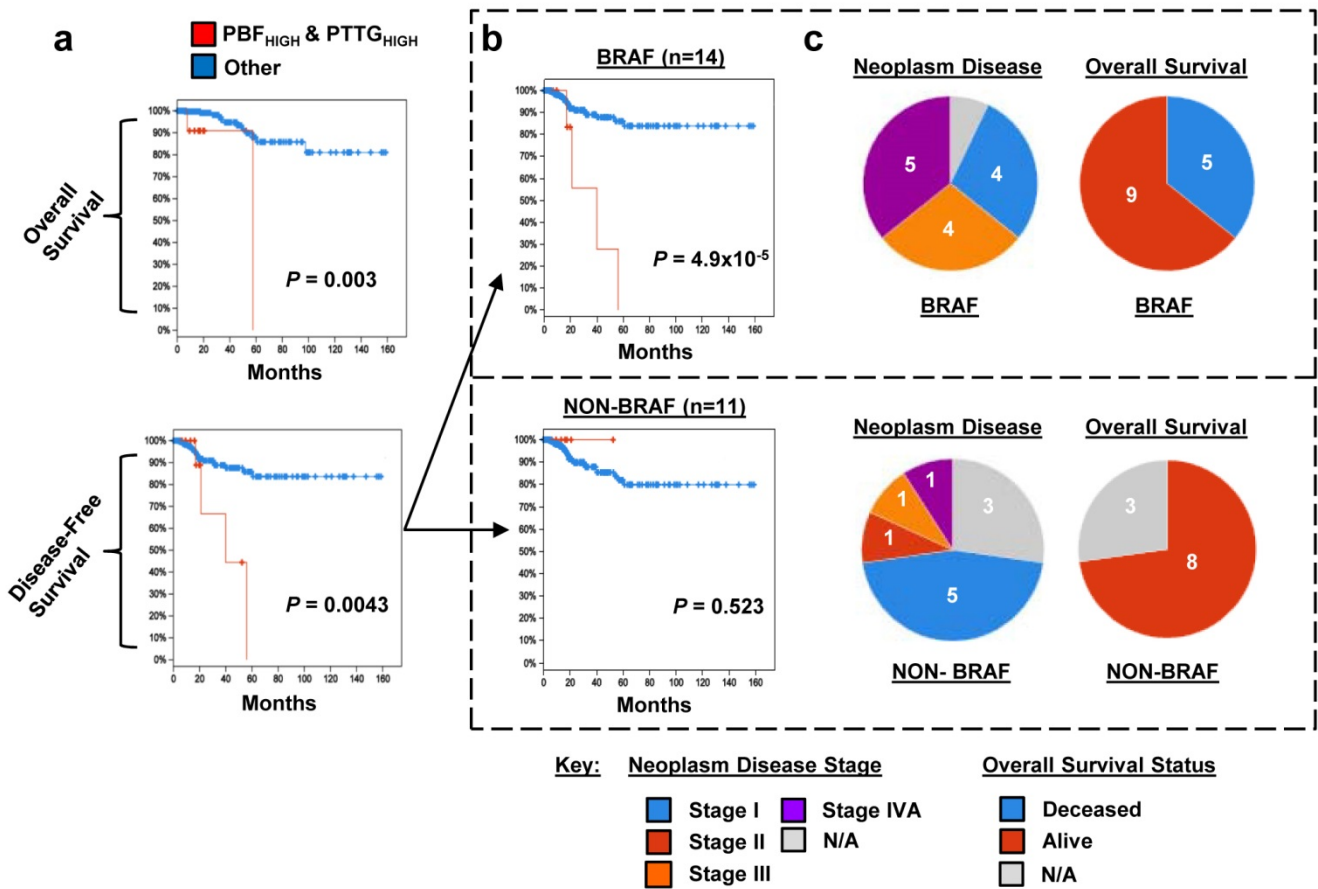

**Supplementary Figure S21.** PBF and PTTG expression with BRAF status is predictive of clinical outcome. **(a)** TCGA clinical data showing overall survival (upper) and disease-free survival (lower) curves for DTC with high PBF and PTTG expression ( $n=25$ ) compared to all DTC cases ( $n=255$ ).  $P$ -values were determined using the log-rank test. **(b)** Disease-free survival curves for BRAF-mutant ( $n=14$ ) and non-BRAF mutant DTC ( $n=11$ ) with high PBF and PTTG expression.  $P$ -values were determined using the log-rank test. **(c)** Pie charts summarize the neoplasm disease stage and overall survival status of DTC with high PBF and PTTG expression and either mutant BRAF (upper) or non-mutant BRAF (lower).

# Supplementary Figure S22

## a TCGA- BRAF PTC

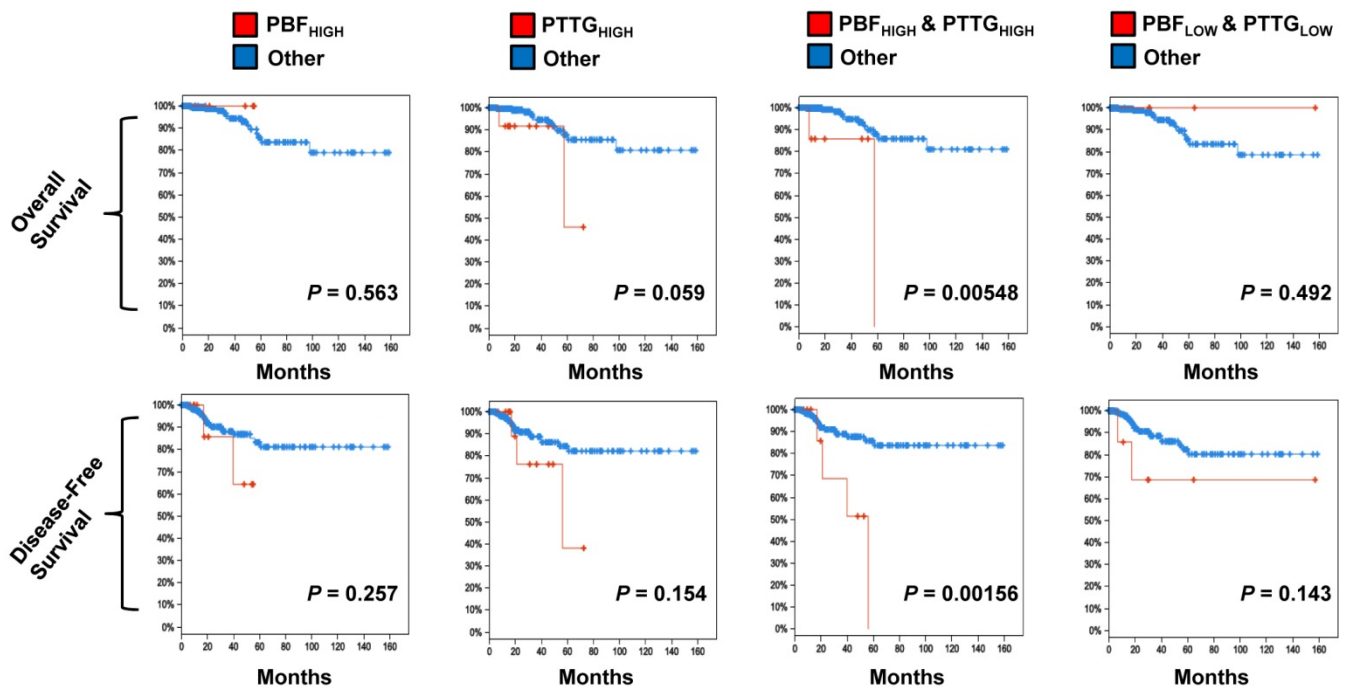

## b

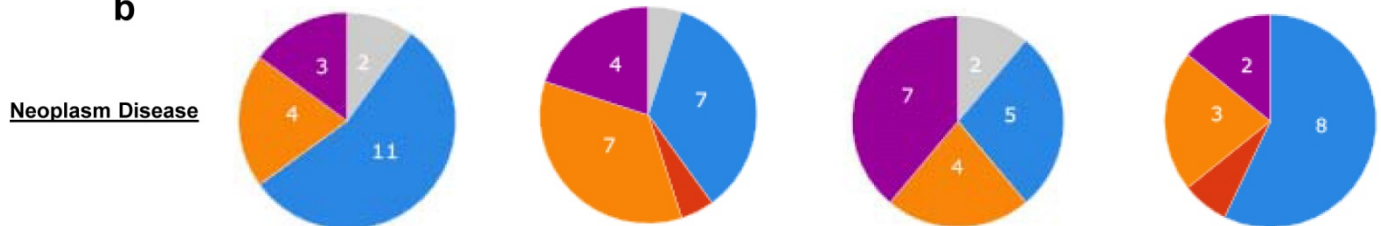

### Key

### Neoplasm Disease Stage

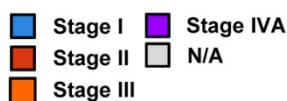

## c Most frequently associated mutations in BRAF-mutant DTC with high PBF/PTTG expression

| Frequency | Gene                                            |
|-----------|-------------------------------------------------|
| 16.7%     | USP9X: Ubiquitin Specific Peptidase 9, X-Linked |
| 11.1%     | NUP93: Nucleoporin 93kDa                        |
| 11.1%     | SPTA1: Spectrin, Alpha, Erythrocytic 1          |
| 11.1%     | COL5A1: Collagen, Type V, Alpha 1               |

**Supplementary Figure S22.** Reduction in patient survival with BRAF-mutant DTC and high PBF/PTTG tumour expression. (a) TCGA clinical data showing overall survival (upper) and disease-free survival (lower) curves for BRAF-mutant DTC of different PBF and PTTG expression subsets compared to all DTC cases. *P*-values were determined by the log-rank test (expression subsets: high PBF (*n*=20), high PTTG (*n*=20), high PBF/high PTTG (*n*=18) and low PBF/low PTTG (*n*=14). (b) Pie charts summarize the neoplasm disease stage of BRAF-mutant DTC with different PBF and PTTG expression subsets. (c) Table shows most frequently associated mutations (>10% incidence) in BRAF-mutant DTC with high PBF and PTTG expression.

# Supplementary Figure S23

## Cyclin D1

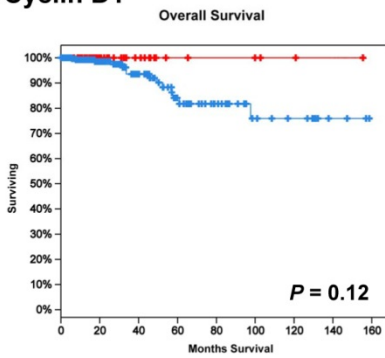

## Cyclin B1

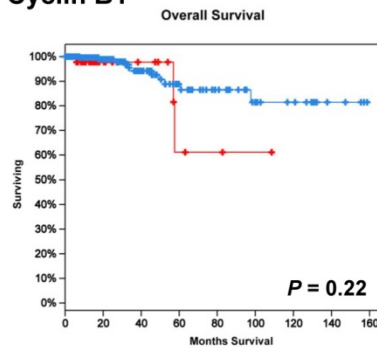

## Bub1

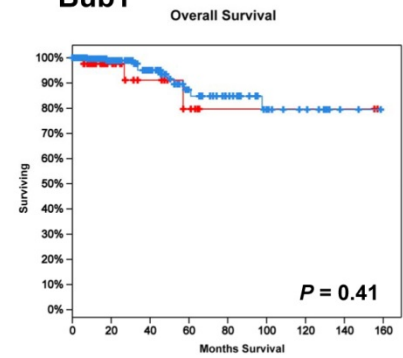

## Cyclin E1

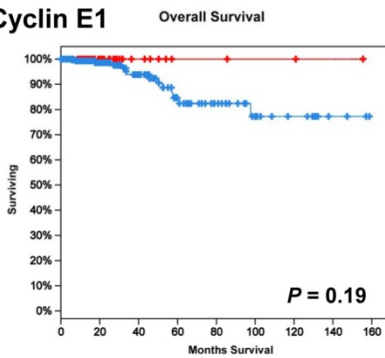

## E2F1

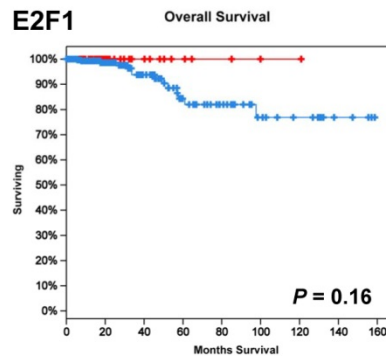

## TOP2A

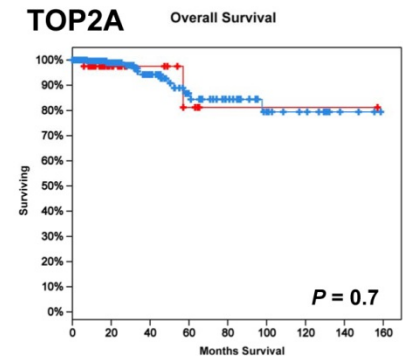

**Supplementary Figure S23.** Lack of association between TCGA patient survival outcome and a panel of cellular proliferation markers. TCGA clinical data showing overall survival curves for DTC with high tumoural expression (i.e. Q4- upper quartile of gene expression in unmatched TCGA cases,  $n=65$ ) of six proliferation markers compared to all DTC cases ( $n=255$ ). Proliferation markers analysed were cyclin D1, cyclin B1, bub1, cyclin E1, e2f1 and top2a as indicated.  $P$ -values were determined by the log-rank test.
