# Supplementary material
Source: PubMed Central journal article supplement (PMC5563453)
Supplement: NIHMS72326-supplement-Supplementary_Table_S1-S3.pdf [file NIHMS72326-supplement-Supplementary_Table_S1-S3.pdf]

## Supplementary Table S1

| Gene Categories                                                           | Gene Panel #1                                                                                                                                                                                                                                                               | Gene Panel #2                                                                                                                                                                                                                                                                                                               |
|---------------------------------------------------------------------------|-----------------------------------------------------------------------------------------------------------------------------------------------------------------------------------------------------------------------------------------------------------------------------|-----------------------------------------------------------------------------------------------------------------------------------------------------------------------------------------------------------------------------------------------------------------------------------------------------------------------------|
| <b>p53 response elements (RE)<sup>1-7</sup></b>                           | ATM <sup>8</sup> , BRCA1 <sup>9</sup> , CHEK1 <sup>10</sup> , FANCC, GADD45A, MGMT <sup>11</sup> , MLH1, MSH2, MUTYH <sup>12</sup> , PMS2, POLD1 <sup>13</sup> , POLH <sup>14</sup> , PTTG1 <sup>10,15</sup> , RAD51 <sup>16</sup> , RAD51C, TDG <sup>17</sup> , TRP53, XPC | APAF1, ATM <sup>8</sup> , BAX, BBC3, BCL2, BID, BRCA1 <sup>9</sup> , CCNG1, CD82, CDC25C, CDK1, CDKN1A, CHEK1, DDB2, EI24, FAS, GADD45A, LRDD, MDM2, MDM4, MYC, PERP, PMAIP1, PML, PPM1D, PTEN, RAD51 <sup>16</sup> , RB1, RFW2, RRM2B, SERPINB5, SERPINE1, SESN1, SESN2, SFN, STEAP3, TNFRSF10B, TP53I3, TP73, TSC2, ZMAT3 |
| <b>p53-p21 pathways<sup>18-20</sup></b>                                   | BRCA2, CHEK1, EXO1, FEN1, H2AFX, LIG1, PMS1, POLD1, POLD3, POLE, PRKDC, RAD1, RAD9A, RAD18, RAD21, RAD23A, RAD51, RBBP4, SMC1A, SMC3, UNG, WRNIP1, XRCC1, XRCC2, XRCC3                                                                                                      | ATR, CCNB1, CCNB2, CCNE1, CDC25A, CDC25C, CDK1, CDK2, CHEK1, CHEK2, E2F1, FANCD2, GTSE1, H2AFX, RAD1, RAD9A, RAD51, RFC1, RPA2, RRM2, SMC1A                                                                                                                                                                                 |
| <b>p53-miRNA pathways<sup>21,22</sup></b>                                 | CHAF1A, CHEK1, DCLRE1A, EXO1, FANCC, FANCG, FEN1, PTTG1, RAD51, TLK1, UNG, XRCC6                                                                                                                                                                                            | CDK4, CDK6, CHEK1, GTSE1, MDM4, THBS1, TLK1                                                                                                                                                                                                                                                                                 |
| <b>p53 interactions (e.g. Sp1)</b>                                        | APEX1 <sup>23,24</sup> , POLD1 <sup>13</sup> , PTTG1 <sup>25</sup> , UBE2A <sup>26</sup>                                                                                                                                                                                    |                                                                                                                                                                                                                                                                                                                             |
| <b>Other putative p53 and/or lincRNA-p21 regulated genes<sup>27</sup></b> | CRY2 <sup>28</sup> , HUS1, MBD4, MPG, MSH3, OGG1, PRKDC <sup>10</sup> , RBM4 <sup>6</sup> , REV1, TERF1 <sup>29</sup> , TDG, UBE2A <sup>28</sup> , WRN                                                                                                                      | CCND1 <sup>28</sup> , CCND2, CCNE2 <sup>30</sup> , CDKN1B, CDKN2A, CREB1, NBN, RCHY1, SESN3                                                                                                                                                                                                                                 |
| <b>Other p21 regulated genes<sup>31</sup></b>                             | PARP2, RAD50                                                                                                                                                                                                                                                                | CASP9, CCND1, CCND3, CDK6, CDKN2A, RAD50                                                                                                                                                                                                                                                                                    |

**Supplementary Table S1.** p53 target genes in gene panels. DDR genes used in study are categorised according to type of p53 target gene. p53 target gene categories are defined as genes regulated by a p53 response element, the p53-p21 pathway, the p53-miRNA pathway (e.g. miR-34), p53 interactions (e.g. Sp1), other putative p53 and/or p53-lincRNA-21 regulated genes and other p21 regulated genes. 58/82 DDR genes (70.7%) were identified as a p53 target gene in gene panel #1 compared to 76/95 genes (80%) in gene panel #2. References are provided to support categorisation of genes as p53 target genes (Supplementary References).

## Supplementary Table S2

| Up-regulated Genes |                                     |           |                        | Down-regulated genes |                        |          |                        |
|--------------------|-------------------------------------|-----------|------------------------|----------------------|------------------------|----------|------------------------|
| Gene               | FC (log <sub>2</sub> ) <sup>1</sup> | Gene      | FC (log <sub>2</sub> ) | Gene                 | FC (log <sub>2</sub> ) | Gene     | FC (log <sub>2</sub> ) |
| TM7SF4             | 9.16                                | CHI3L1    | 5.68                   | LRP1B                | -7.58                  | DPT      | -5.07                  |
| SYT12              | 8.36                                | TMEM215   | 5.62                   | PKHD1L1              | -7.24                  | SLC4A4   | -5.07                  |
| ZCCHC12            | 8.33                                | ASPHD1    | 5.5                    | SLC5A5               | -7.22                  | FOXJ1    | -5.04                  |
| TMPRSS4            | 8.26                                | C20orf103 | 5.5                    | WSCD2                | -6.98                  | CA4      | -5.03                  |
| GABRB2             | 7.81                                | PDZK1IP1  | 5.47                   | C13orf36             | -6.80                  | DGKI     | -5.03                  |
| KLK10              | 7.59                                | ADAMTS14  | 5.42                   | TFF3                 | -6.65                  | DIO1     | -5.02                  |
| SLIT1              | 7.43                                | CEACAM6   | 5.39                   | CCL21                | -6.50                  | IPCEF1   | -5.01                  |
| STRA6              | 7.41                                | SFTPA1    | 5.38                   | SEMA3D               | -6.344                 | MPPED2   | -4.99                  |
| KLK7               | 7.22                                | LCN2      | 5.35                   | GPC3                 | -6.33                  | ASXL3    | -4.99                  |
| B3GNT3             | 7.08                                | CD164L2   | 5.29                   | MRO                  | -6.22                  | PAK3     | -4.97                  |
| KRT15              | 6.84                                | HPCAL4    | 5.23                   | ADH1B                | -6.21                  | GPM6A    | -4.96                  |
| NGEF               | 6.79                                | CACNG4    | 5.20                   | TPO                  | -6.17                  | FOXP2    | -4.96                  |
| GRHL3              | 6.78                                | LAMB3     | 5.17                   | DPP6                 | -6.17                  | SLITRK5  | -4.93                  |
| PRR15              | 6.67                                | COMP      | 5.16                   | CDH16                | -6.07                  | DLG2     | -4.92                  |
| SYTL5              | 6.57                                | ELFN2     | 5.15                   | MAPK4                | -5.99                  | KIF19    | -4.91                  |
| SLC6A20            | 6.49                                | TREM1     | 5.14                   | LOC286002            | -5.85                  | PLA2R1   | -4.88                  |
| RXRG               | 6.34                                | SFN       | 5.12                   | CWH43                | -5.76                  | CRABP1   | -4.79                  |
| SFTPB              | 6.35                                | GDF15     | 5.06                   | EDN3                 | -5.76                  | TCEAL2   | -4.67                  |
| PPP1R1B            | 6.25                                | PLEKHN1   | 5.01                   | CNTFR                | -5.72                  | GRIN2C   | -4.66                  |
| RASGRF1            | 6.18                                | DPP4      | 5.01                   | SLC26A7              | -5.69                  | ATP2C2   | -4.64                  |
| TMEM163            | 6.11                                | SLC34A2   | 4.98                   | STXBP5L              | -5.66                  | GPR98    | -4.59                  |
| KCNN4              | 6.11                                | C1orf106  | 4.94                   | MT1G                 | -5.66                  | OCA2     | -4.59                  |
| KLHDC8A            | 5.97                                | EPHA10    | 4.93                   | MT1H                 | -5.66                  | DES      | -4.58                  |
| ST6GALNAC5         | 5.94                                | CITED1    | 4.92                   | SLC26A4              | -5.60                  | CECR2    | -4.57                  |
| PCSK1N             | 5.92                                | IGSF1     | 4.86                   | TFCP2L1              | -5.59                  | C8orf80  | -4.57                  |
| PVRL4              | 5.92                                | GOLT1A    | 4.85                   | CHRD1                | -5.54                  | FAM189A1 | -4.56                  |
| GJB3               | 5.91                                | CDH3      | 4.82                   | NWD1                 | -5.41                  | GDF10    | -4.54                  |
| HCN4               | 5.75                                | CYP2S1    | 4.78                   | BMP8A                | -5.39                  | FABP4    | -4.53                  |
| SERPINA1           | 5.72                                | FAM5B     | 4.78                   | AOX1                 | -5.39                  | IGSF10   | -4.53                  |
| FN1                | 5.69                                | AGR2      | 4.77                   | RYR2                 | -5.10                  | KCTD16   | -4.52                  |

<sup>1</sup>FC- Fold-change

**Supplementary Table S2.** Differentially expressed genes in DTC with high PBF and PTTG expression. Genes are ranked in order of fold-change of expression (log<sub>2</sub> values) in human thyroid tumours compared to matched normal thyroid tissue.

## Supplementary Table S3

| PBF Custom Primers | Sequence                                     |
|--------------------|----------------------------------------------|
| Forward            | 5'-GCA GAG ATG AAG ACA AGA CAT GA-3'         |
| Reverse            | 5'-GCG TGC ACC TCA CAG GAA G-3'              |
| Probe              | 5' FAM-TCC AGC ACA TCA GTC CCG ACG-TAMRA 3'. |

| Commercial Taqman Assays |                  |
|--------------------------|------------------|
| Gene target              | Catalogue Number |
| <i>Pttg</i>              | Hs00851754_u1    |
| <i>Chek1</i>             | Hs00967506_m1    |
| <i>Exo1</i>              | Hs01116195_m1    |
| <i>Brcal</i>             | Hs01556193_m1    |
| <i>Rad51</i>             | Hs00947967_m1    |
| <i>PPIA</i>              | Hs04194521_s1    |
| <i>HPRT1</i>             | Hs01003267_m1    |

| PCR condition #1                               |             |             |  |
|------------------------------------------------|-------------|-------------|--|
| <b><u>QuantiTect Probe RT-PCR (Qiagen)</u></b> |             |             |  |
| <b>Step</b>                                    | <b>Time</b> | <b>Temp</b> |  |
| Reverse transcription                          | 30 min      | 50°C        |  |
| PCR activation step                            | 15 min      | 95°C        |  |
| <b>2-step cycling:</b>                         |             |             |  |
| Denaturation                                   | 15 s        | 94°C        |  |
| Combined annealing/<br>extension               | 60 s        | 60°C        |  |
| Number of cycles:                              | 40          |             |  |

| PCR condition #2                 |             |             |  |
|----------------------------------|-------------|-------------|--|
| <b><u>qPCR</u></b>               |             |             |  |
| <b>Step</b>                      | <b>Time</b> | <b>Temp</b> |  |
| Initial step                     | 2 min       | 50°C        |  |
| PCR activation step              | 10 min      | 95°C        |  |
| <b>2-step cycling:</b>           |             |             |  |
| Denaturation                     | 15 s        | 95°C        |  |
| Combined annealing/<br>extension | 60 s        | 60°C        |  |
| Number of cycles:                | 40          |             |  |

**Supplementary Table S3.** Primers and PCR conditions used in study. Suppliers were Alta Bioscience, Eurogentec and ThermoFisher Scientific. PPIA and HPRT1 Taqman assays were used in combination as internal controls.
